# Supplementary material for: Technical note: Sequential ensemble data assimilation in convergentand divergent systems
Source: Copernicus journal article supplement (doi:10.5194/hess-2020-668), 2021-02-17
Supplement: Supplementary file [file hess-2020-668-AC1-supplement.pdf]

## Answer to Review by Referee #1

*In this paper, the authors investigate the difference in the impact of data assimilation for convergent and divergent systems. They conclude that a different approach is needed for these two types of systems.*

*I have a dual opinion of the paper after having read it. On the one hand, this is an issue that has been under-investigated in hydrology, and could use some more research. On the other hand, there are a number of issues with the paper that really need to be addressed before the paper can be published.*

**Reply:** We thank the reviewer for the fast response and confirming the relevance of the work. We have revised the manuscript accordingly and attached a file showing the differences. We refer to this file when giving line numbers in our response.

Several of the raised specific comments address a common issue regarding the generation of an adequate ensemble. We first discuss this issue in general, before addressing the specific comments:

The reviewer argues that an adequate generation of the ensemble avoids filter degeneration and that consequently methods to counteract filter degeneracy, like inflation methods, are not necessary. If we neglect issues like spurious correlations, we agree with the reviewer. Then, if all model errors are represented, the ensemble is generated adequately. We also agree, that this is possible in a synthetic cases, where these errors can be represented. However, in real-world systems, this is extremely difficult or even impossible based on the available process understanding.

We would like to illustrate this on the example of soil water movement, which is used in this study as an example for a convergent system. We describe soil water movement using the Richards equation. The Richards equation is based on several assumptions when deriving this macroscopic continuum equation (from a pore scale description). One of these assumptions is the so called local equilibrium assumption, which assumes that the changes in the external forcing are slow compared to the time scales of the equilibration at the local scale. This assumption is often valid, but can be violated for example during strong rain events. If this assumption is violated, the employed equation itself is not valid anymore. An accurate representation of this error is beyond the currently available knowledge.

Of course, some uncertainties to cover this error could be introduced, for example through assigning different parameter values to different ensemble members. However, this is by far not an adequate ensemble. Not only will these errors be represented rather crudely when they occur and lead to wrong correlations to unobserved locations leading to physically wrong predictions in the analysis, but also will the model error be by far too large when the local equilibrium assumption holds and erroneously bias the estimation towards the measurements. Therefore, parameter uncertainties should only reflect the uncertainties in the parameter, not more. This shows that creating such an adequate ensemble can be extremely difficult, or even impossible.

Please also note, that the approach of representing uncertainties through model parameters has been called model-specific inflation in the literature (Constantinescu et al., 2007).

We show in the manuscript that in a divergent system, it may not be necessary to represent all the uncertainties fully in the model to generate an adequate ensemble, due the divergent dynamics, which increases model uncertainties additionally. In a convergent system it becomes more relevant to represent the errors. This means it becomes more difficult or impossible to generate such an adequate ensemble in real-world cases. We illustrated this by not representing a parameter error in both systems. While such a parameter error can be represented well, model structural errors (such as the local equilibrium assumption in the Richards equation) can't.

If it is not possible to generate an adequate ensemble, this means, a strict approach that relies on the generation of an adequate ensemble is not practicable, particularly in convergent systems. This then shows that the use of heuristic methods to counteract filter degeneracy (i.e. inflation methods) becomes necessary.

We have improved this description throughout the manuscript in the response to the individual issues below.

*Introduction Line 32: In ensemble data assimilation methods, ..., this leads to decreasing uncertainties over time, which favors filter degeneration. If the filter degenerates, that means that the ensemble is not generated correctly. An adequate generation of the ensemble should prevent this.*

**Reply:** We agree, that an ensemble that accurately describes all model uncertainties could prevent this. As mentioned above this may not be possible. At this location in the introduction, our aim is to point out the difference between convergent and divergent systems. We altered the sentence slightly to clarify that our statement refers to a case when only state uncertainties are represented in the model. In this case our statement remains true.

We changed the statement to (lines 32-34):

“Several geophysical system, such as soil hydrology or atmospheric chemical transport are convergent systems. In ensemble data assimilation methods, if uncertainties are only represented through an ensemble of states, this leads to decreasing uncertainties over time, which favors filter degeneration.”

*Line 37: You are forgetting uncertainties in the meteorological forcings!*

**Reply:** Meteorological forcings are included in the term 'boundary conditions'. To make this clearer, we extended the phrase to 'boundary conditions, which include external forcings'.

Lines 37-39 in the manuscript now read:

“The largest uncertainties in convergent systems typically do not reside in uncertain initial conditions but rather in boundary conditions, which include external forcings, the representation of sub-scale physics through parameterizations, and unrepresented physics in the model equations.”

*Line 40: The Kalman filter has been developed to estimate states. In system theory, a parameter is defined as a variable that does not change. I know it is common practice to also update parameters, but it is worth noting that this violates the theoretical basis of the Kalman filter.*

**Reply:** We agree that the Kalman filter has been developed to estimate states. We also agree, that parameters are defined as variables that do not change. That is why the forward model for parameters is typically assumed to be constant to reflect this. The parameter estimation in the data assimilation is then used to reduce initial uncertainty of the parameter value. For example Evensen (2007) presented the theoretical basis for the joint estimation of states and parameters for the EnKF. We therefore decided to not apply any changes to the manuscript.

*Line 43: A random walk is also often used as parameter model.*

**Reply:** We have extended the section.

Lines 42-47 in the manuscript now read:

“Estimating parameters in ensemble data assimilation methods through an augmented state requires a forward model for the parameters as well. This model is typically assumed to be constant, which is neither divergent nor convergent. However, the filter will gradually reduce the uncertainty in the parameters, which is not increased through a divergent forward model and challenges similar to convergent systems can arise. This is sometimes alleviated by assigning a random walk as the forward model to the parameters, which then requires to determine an appropriate step size, however.”

*Line 47: Inflation methods are a complete violation of the theoretical foundation of the Kalman filter. The update equations are derived by minimizing the posterior state error. Adding this inflation will, by default, lead to suboptimal results. A correct ensemble generation will solve the need to do this.*

**Reply:** As mentioned in our response above, it may not be possible to generate an appropriate ensemble.

Please note, that there is also a fundamental justification for increasing the ensemble spread, even if an appropriate ensemble can be generated: Ensemble methods necessarily have a finite number of ensemble members leading to spurious correlations. These will then lead to a too small ensemble spread (Houtekamer

and Mitchell, 1998). For this, van Leeuwen (1999) gives the theoretical justification. This means that the EnKF has a fundamental issue, due to a finite ensemble size, that leads to too small uncertainties. Ways to counteract this are needed. This will then lead to improved results. Therefore, we disagree. Inflation methods have the potential to improve the results if applied appropriately.

Nevertheless, this is an important point and inflation methods are heuristic. We added in the manuscript (Lines 49-51):

“This would require an adequate representation of all uncertainties, including unrepresented physics in the model equations. In real world systems this is often difficult or impossible. Therefore, practical alternatives are necessary, which are often heuristic and may interfere with basic assumptions in the data assimilation methods, however.”

*Line 51: If the parameter uncertainty is kept constant, the Kalman filter is effectively reduced to optimal interpolation. This should be clarified.*

**Reply:** For the parameter part, keeping the uncertainty constant, indeed corresponds to a pre-defined covariance matrix as in optimal interpolation. However, if this is applied within an augmented state, the state component of the covariance matrix is not fixed and still calculated by propagating the ensemble with the model equations. Therefore, we prefer not to make this connection to optimal interpolation here.

*Line 53: Same comment as for line 47. Using this damping factor is a complete contradiction of the theoretical foundation of the Kalman filter. The author of that paper is Hendricks Franssen, by the way.*

**Reply:** Thank you for pointing out the error in the citation, we corrected it in the bibtex file. We added an explanation to the beginning of the paragraph in response to the comment on line 47 addressing the violations of theoretical foundations.

*Line 107-111: This is very unclear. Please think about reformulating in a manner to make this easier to digest.*

**Reply:** We simplified the description. We limited it to the the leading Lyapunov exponent, which is sufficient for this manuscript.

Lines 112-120 now read:

“The Lyapunov exponent quantifies how fast two initially infinitesimal close trajectories will separate. Analyzing the leading Lyapunov exponent for  $F = 8$  shows a doubling time of  $\tau_d = 0.42$  units for the distance between two initially infinitesimally close neighboring states (Lorenz and Emanuel, 1998). Increasing the forcing leads to a more divergent system, for instance  $\tau_d = 0.3$  for  $F = 10$  (Lorenz, 1996). With  $\tau_d$  decreasing, so does the predictability of the system.”

*Figure 1: Does "forecast" mean the open loop (forward) run?*

**Reply:** Yes, we replaced 'Forecast' with 'Forward run' to make this clearer.

*Line 150: Do you mean Fig. 1c?*

**Reply:** Yes, thank you for noticing. We corrected this in the manuscript.

*Line 189: Usually, in soil moisture data assimilation studies, only the surface layer soil moisture is assimilated. Please justify this strategy. Also, an observation error of 0.007 seems quite low.*

**Reply:** Assimilating just the surface layer may suffice for atmospheric applications. Ours is the common approach in vadose zone hydrology (e.g., Li and Ren, 2011; Wu and Margulis, 2013; Song et al., 2014; Erdal et al., 2014, 2015; Bauser et al., 2016; Brandhorst et al., 2017; Valdes-Abellan et al., 2019). The observation error of 0.007 is rather low. It corresponds to high quality measurements as obtained with time domain reflectometry (TDR)-sensors.

We extended the description in the manuscript to (Lines 195-197):  
“Four time domain reflectometry (TDR)-like water content observations are generated equidistantly at depths of (0.2, 0.4, 0.6, 0.8) m. The observation error is chosen to be  $\sigma_{\text{Obs}} = 0.007$  (e.g., Jaumann and Roth, 2017).”

*Line 192: This is very important. It is stated: To generate the initial ensemble, the ensemble mean is perturbed by a correlated multivariate Gaussian distribution. This is very unclear. Please provide a better explanation on how the ensemble is generated, as this is very important, and could help interpret the results later in the paper.*

**Reply:** The initial ensemble is generated by perturbing the initial water content state. The perturbation is spatially correlated to avoid an immediate spatial dissipation of the perturbations.

We extended the description in the manuscript to (Lines 198-205):

“To generate the initial ensemble, the ensemble mean of the water content state is perturbed by a correlated multivariate Gaussian distribution using a Cholesky decomposition to create an ensemble that corresponds to a predefined covariance matrix (e.g., Berg et al., 2019). The main diagonal of this covariance matrix of the ensemble is  $0.003^2$ . The off-diagonal entries are determined by multiplying the variance on the main diagonal with the fifth-order piecewise rational function by Gaspari and Cohn (1999) using a length scale of  $c = 10$  cm. This ensures a spatially correlated initial state, which increases the diversity of the ensemble. If instead uncorrelated Gaussian random numbers with a zero mean were used, the dissipative component of the system would lead to a fast dissipation of the perturbation in space for each individual ensemble member.”

*Immediately below figure 2: This case shows that the predictability for a perfect convergent system is infinite. I do not agree. It shows that the ensemble is not adequately generated.*

**Reply:** In this case no data assimilation is employed. A perfect model is initialized with different initial states. Since this is a convergent system, these states converge to the truth, if a perfect model is employed (which includes perfect boundary conditions, etc.). The truth is predicted with an increasing accuracy and decreasing uncertainty. Of course, a perfect system will not occur (which is also stated in the manuscript). However, it is important to understand this fundamental difference when applying data assimilation to convergent systems.

To clarify this we extended the description in the manuscript to (Lines 220-222):

“This case shows that the predictability for a perfect convergent system is infinite (in contrast to divergent systems, that only have a finite limit of predictability even if the model including boundary conditions is perfectly known). After a transient phase, the states converge to the truth (Kalnay, 2003). A perfect model is not what we encounter in reality, however.”

*Line 230: I would argue that disturbing the  $n$  values leads to an ensemble that is well generated, which explains the better results.*

**Reply:** We agree. In this synthetic case the model error is completely known and consequently can be represented in the ensemble. We clarify this in the manuscript. Please also note, that this approach has been called a model-specific inflation method (Constantinescu et al., 2007).

We extended the description in the manuscripts (Lines 240-243)

“In this case, the parameter error is represented with the ensemble but the parameter is not estimated. Each ensemble member has a different parameter  $n$ . The parameters are Gaussian distributed with  $\mathcal{N}(2.68, 0.4^2)$  such that the truth lies within one standard deviation. Since the model error is known in this synthetic case we can create an ensemble that represents the model error adequately. Note, that this is more difficult or even impossible in a real-world system.”

*Line 268: A model is never perfect, so a better word than "perfect" should be used.*

**Reply:** We agree. Still, we can explore the consequences if the model were perfect.

*Line 283: Again, you are forgetting meteorological forcings.*

**Reply:** We added boundary conditions to this list.

Lines 295-297 now read:

“For the application of data assimilation to real data, model errors typically cannot be attributed to unknown parameters or uncertainties in boundary conditions alone, but also stem from model structural errors like a simplified representation of sub-scale physics or unrepresented processes in the dynamics.”

*Line 290, 291 and 296: Again, inflation, and using a constant ensemble spread, are tricks that are used to compensate for a poorly generated ensemble.*

**Reply:** To better motivate the relevance of inflation methods we have improved the prior paragraph and have changed the introduction to this paragraph that covers inflation methods.

Lines 295-307 now read:

“For the application of data assimilation to real data, model errors typically cannot be attributed to unknown parameters or uncertainties in boundary conditions alone, but also stem from model structural errors like a simplified representation of sub-scale physics or unrepresented processes in the dynamics. Uncertainties in parameters and boundary conditions can be represented in an ensemble, but representing model structural errors is challenging or can be impossible. For example, in hydrology, the model errors are typically ill-known (Li and Ren, 2011) and can vary both in space and time, which then can lead to filter degeneracy and biased parameter estimation (Berg et al., 2019). While divergent models can alleviate the effect of an unrepresented error within bounds, in a convergent system it is necessary to represent all relevant model errors sufficiently to prevent filter degeneracy and enable an optimal state and parameter estimation. Since this is challenging or even impossible, heuristic ways to address filter degeneracy are necessary.

A practical alternative to increase the ensemble spread and avoid filter degeneracy are inflation methods. [...]”

We have extended our criticism on inflation methods in Lines 317-318:

“Heuristic inflation methods cannot fully replace the representation of model errors and hence must be used judiciously. They can lead to overinflation of spurious correlations and can lead to biases in the estimation of parameters.”

*As stated above, I am in favor of the idea of the study, as this is important. But the issues I mentioned should be resolved before the paper can be published.*

**Reply:** We thank the reviewer for raising the issues, which helped clarifying the manuscript.

## Additional References

Brandhorst, N., Erdal, D., and Neuweiler, I.: Soil moisture prediction with the ensemble Kalman filter: Handling uncertainty of soil hydraulic parameters, *Advances in Water Resources*, 110, 360–370, <https://doi.org/10.1016/j.advwatres.2017.10.022>, 2017.

Evensen, G., *Data Assimilation: The Ensemble Kalman Filter*. New York: Springer, 2007.

Erdal, D., Neuweiler, I., and Wollschläger, U.: Using a bias aware EnKF to account for unresolved structure in an unsaturated zone model, *Water Resources Research*, 50, 132–147, <https://doi.org/10.1002/2012WR013443>, 2014.

Erdal, D., Rahman, M., and Neuweiler, I.: The importance of state transformations when using the ensemble Kalman filter for unsaturated flow modeling: Dealing with strong nonlinearities, *Advances in Water Resources*, 86, 354–365, <https://doi.org/10.1016/j.advwatres.2015.09.008>, 2015.

Houtekamer, P. L., and H. L. Mitchell, A sequential ensemble Kalman filter for atmospheric data assimilation, *Monthly Weather Review*, 129(1), 123–137, doi:10.1175/1520-0493(2001)129;0123:ASEKFF;2.0.CO;2, 2001.

Li, C. and Ren, L.: Estimation of unsaturated soil hydraulic parameters using the ensemble Kalman filter, *Vadose Zone Journal*, 10, 1205– 1227, <https://doi.org/10.2136/vzj2010.0159>, 2011.

Song, X., Shi, L., Ye, M., Yang, J., and Navon, I. M.: Numerical comparison of iterative ensemble Kalman filters for unsaturated flow inverse modeling, *Vadose Zone Journal*, 13, <https://doi.org/10.2136/vzj2013.05.0083>, 2014.

Valdes-Abellan, J., Pachepsky, Y., Martinez, G., and Pla, C.: How Critical Is the Assimilation Frequency of Water Content Measurements for Obtaining Soil Hydraulic Parameters with Data Assimilation?, *Vadose Zone Journal* 18, doi:10.2136/vzj2018.07.0142, 2019

van Leeuwen, P. J., Comment on “Data assimilation using an ensemble Kalman filter technique”, *Monthly Weather Review*, 127(6), 1374–1377, doi:10.1175/1520- 0493(1999)127;1374:CODAUA;2.0.CO;2, 1999.

Wu, C.-C. and Margulis, S. A.: Real-time soil moisture and salinity profile estimation using assimilation of embedded sensor datastreams, *Vadose Zone Journal*, 12, <https://doi.org/10.2136/vzj2011.0176>, 2013.

# Technical note: Sequential ensemble data assimilation in convergent and divergent systems

Hannes Helmut Bauser<sup>1,2</sup>, Daniel Berg<sup>2,3</sup>, and Kurt Roth<sup>2,4</sup>

<sup>1</sup>Biosphere 2, University of Arizona, USA

<sup>2</sup>Institute for Environmental Physics (IUP), Heidelberg University, Germany

<sup>3</sup>HGS MathComp, Heidelberg University, Germany

<sup>4</sup>Interdisciplinary Center for Scientific Computing (IWR), Heidelberg University, Germany

**Correspondence:** Hannes Helmut Bauser (hbauser@arizona.edu)

**Abstract.** Data assimilation methods are used throughout the geosciences to combine information from uncertain models and uncertain measurement data. However, the characteristics of geophysical systems differ and may be distinguished between divergent and convergent systems. In divergent systems initially nearby states will drift apart, while they will coalesce in convergent systems. This difference has implications for the application of sequential ensemble data assimilation methods. This study explores these implications on two exemplary systems: the divergent Lorenz-96 model and the convergent description of soil water movement by the Richards equation. The results show that sequential ensemble data assimilation methods require a sufficient divergent component. This makes the transfer of the methods from divergent to convergent systems challenging. We demonstrate through a set of case studies that it is imperative to represent model errors adequately and incorporate parameter uncertainties in ensemble data assimilation in convergent systems.

## 1 Introduction

Information on physical systems is often available in two forms: on the one hand from observations and on the other hand through mathematical models describing the systems dynamics. The combination of both can lead to an improved description of the system. This is the aim of data assimilation, typically with a focus on state estimation.

Data assimilation has broad applications throughout the geosciences and can be already seen as an independent discipline (Carrassi et al., 2018). It is typically used to estimate states, but also parameters: in weather forecasting (Houtekamer and Zhang, 2016; Ruiz et al., 2013), for atmospheric chemical transport (Carmichael et al., 2008; Zhang et al., 2012) also coupled to meteorology (Bocquet et al., 2015), in oceanography including biogeochemical processes (Stammer et al., 2016; Edwards et al., 2015), and in hydrology for flow, transport, and reaction in terrestrial surface and subsurface systems (Liu et al., 2012). Data assimilation is also increasingly applied in ecology with applications ranging from the spread of infectious diseases and wildfires, to population dynamics, and to the terrestrial carbon cycle (Niu et al., 2014; Luo et al., 2011).

The geophysical systems may be distinguished between divergent and convergent systems, depending on the development of two initially nearby states. In a divergent system, initially close states will inevitably drift apart, even if the system is described by a perfect model (Kalnay, 2003). This leads to an upper limit for the predictability in divergent systems (Lorenz, 1982). In a

convergent system, nearby trajectories will coalesce. If the model to describe such a convergent system is perfect, this results  
25 in a high predictability (Lorenz, 1996). An error in the initial state will decay towards the truth after some transient phase.  
However, this is only true for perfect models, which is usually not the case for geophysical systems. This can lead to a bias  
with the state converging to a wrong state.

Many recent advances of data assimilation methods have been developed in the context of weather forecasting (van Leeuwen  
et al., 2015). They are therefore designed to meet the challenges in the atmosphere – a divergent system. Due to the fundamental  
30 limit for long time predictions from uncertain initial conditions in divergent systems, data assimilation in operational weather  
forecasting primarily focuses on state estimation (Reichle, 2008; van Leeuwen et al., 2015).

Several geophysical system, such as soil hydrology or atmospheric chemical transport are convergent systems. In ensemble  
data assimilation methods, ~~where uncertainties are~~ if uncertainties are only represented through an ensemble of states, this  
leads to decreasing uncertainties over time, which favors filter degeneration. This difference to divergent systems, where the  
35 ensemble spread increases exponentially, makes the direct transfer of data assimilation methods from divergent systems to  
convergent systems challenging and often requires adaptations to prevent filter degeneracy.

The largest uncertainties in convergent systems typically do not reside in uncertain initial conditions but rather in boundary  
conditions, which include external forcings, the representation of sub-scale physics through parameterizations, and unre-  
presented physics in the model equations. These uncertainties should then be addressed integrately (Liu and Gupta, 2007).  
40 Therefore, data assimilation methods have been used to not only estimate states but to also estimate parameters to reduce these  
uncertainties. The combined estimation of states and parameters is thought to be a solution of reducing the impact of model  
errors on parameter estimation (Liu et al., 2012). Estimating parameters in ensemble data assimilation methods through an  
augmented state requires a forward model for the parameters as well. This model is typically assumed to be constant, which is  
neither divergent nor convergent. However, the filter will gradually reduce the uncertainty in the parameters, which is not in-  
45 creased through a divergent forward model and challenges similar to convergent systems can arise. This is sometimes alleviated  
by assigning a random walk as the forward model to the parameters, which then requires to determine an appropriate step size,  
however.

A challenge for sequential ensemble data assimilation in convergent systems it to maintain a sufficient ensemble spread.  
This would require an adequate representation of all uncertainties, including unrepresented physics in the model equations. In  
50 real world systems this is often difficult or impossible. Therefore, practical alternatives are necessary, which are often heuristic  
and may interfere with basic assumptions in the data assimilation methods, however. One possibility are inflation methods,  
which counteract the coalescing tendency. Unfortunately, there exist no universal method to accomplish this and a range of  
approaches are followed. One example is the increase of the ensemble spread of parameters to a threshold value, as soon as  
the parameter uncertainty drops below this value. This approach has was introduced for a see-breeze model (Aksoy et al.,  
55 2006) and has been used in hydrology, as well (e.g. Shi et al., 2014; Rasmussen et al., 2015). A modification to this, also  
applied in hydrology, is to keep the parameter uncertainty entirely constant (Han et al., 2014; Zhang et al., 2017). This ensures  
a sufficient ensemble spread in the state itself, but can impact the accuracy of the estimation. A widely used adjustment to  
limit the reduction of an ensemble spread in hydrology is the use of a damping factor (Hendricks Franssen and Kinzelbach,



2008). Also in hydrology, a multiplicative inflation method was proposed, specifically adjusted to the needs of the system  
 60 (Bauser et al., 2018). Similarly, Constantinescu et al. (2007) showed that an atmospheric chemical transport model required  
 stronger inflation and showed better results for a model specific inflation, where the key parameters are perturbed to achieve  
 an increased spread in the state. Consequently, a better understanding and control over errors has been recognized as a major  
 challenge in chemical data assimilation as well (Zhang et al., 2012).

Although plenty of knowledge and experience is available in the different communities how to handle data assimilation  
 65 methods in their specific model, we are not aware of a fundamental analysis of the difference between divergent and convergent  
 models with respect to their utilization within ensemble data assimilation frameworks. We investigate and demonstrate the  
 different challenges using the ensemble Kalman filter (Evensen, 1994; Burgers et al., 1998). The divergent case is illustrated  
 using the Lorenz-96 model (Lorenz, 1996), while for the convergent case, a soil hydrological system described by Richards  
 equation is used.

## 70 2 Data assimilation method

For this study we chose the ensemble Kalman filter (EnKF), a sequential data assimilation method, based on Bayes' theorem  
 and the assumption of unbiased Gaussian error distributions. It was introduced as an extension of the Kalman filter (Kalman,  
 1960) for nonlinear models (Evensen, 1994; Burgers et al., 1998) and approximates the Gaussian distributions by an ensemble  
 of states  $\psi_i$ , where the subscript  $i$  denotes the ensemble member.

75 To sequentially assimilate new observations, the EnKF alternates between a forecast (subscript 'f') and an analysis step  
 (subscript 'a'). In the forecast, the ensemble is propagated using the nonlinear model  $f(\cdot)$

$$\psi_{f,i}^k = f(\psi_{f,i}^{k-1}) + \beta^k, \quad (1)$$

where  $\beta^k$  is a stochastic model error and  $k$  is a discrete time.

The analysis state  $\psi_a$  is calculated by applying the Kalman gain

$$80 \quad \mathbf{K}^k = \mathbf{P}_f^k \mathbf{H}^\top (\mathbf{H} \mathbf{P}_f^k \mathbf{H}^\top + \mathbf{R}^k)^{-1} \quad (2)$$

to every ensemble member. The Kalman gain weights the forecast error covariance  $\mathbf{P}$  with the observation error covariance  $\mathbf{R}$ .  
 The observation operator  $\mathbf{H}$  maps the state from state space to observation space. The forecast error covariance  $\mathbf{P}$  is calculated  
 using the forecast ensemble

$$\mathbf{P}_f^k = \overline{(\psi_f^k - \overline{\psi_f^k}) (\psi_f^k - \overline{\psi_f^k})^\top}. \quad (3)$$

85 It is necessary to add a realization of the observation error to the observation for each ensemble member (Burgers et al.,  
 1998). The resulting analysis state is

$$\psi_{a,i}^k = \psi_{f,i}^k + \mathbf{K}^k \left( d^k - \mathbf{H} \psi_{f,i}^k + \epsilon_i^k \right), \quad \epsilon_i^k \propto \mathcal{N}(\mathbf{0}, \mathbf{R}^k). \quad (4)$$

For sequential data assimilation, the process of forecast and analysis is iterated for every new observation.

The joint estimation of states and parameters can be realized through state augmentation. The original state  $\psi$  is extended  
 90 with the parameters  $p$  to an augmented state

$$\mathbf{u} = \begin{pmatrix} \psi \\ p \end{pmatrix}. \quad (5)$$

The model equation (Eq. 1) changes to

$$\mathbf{u}^k = \begin{pmatrix} \psi^k \\ p^k \end{pmatrix} = \begin{pmatrix} f_\psi(\psi^{k-1}, p^{k-1}) + \beta_\psi^k \\ f_p(p^{k-1}) + \beta_p \end{pmatrix}, \quad (6)$$

with the models for the state  $f_\psi(\cdot)$  and for the parameters  $f_p(\cdot)$ , as well as the corresponding model errors  $\beta_\psi$  and  $\beta_p$ . The  
 95 model for the state is typical nonlinear, while the parameters are often assumed constant  $f_p(p^{k-1}) = p^{k-1}$ .

In this study, we set both stochastic model errors in Eq. (6) to zero. The EnKF is used without any extensions and an ensemble size of  $N = 100$  was chosen for all cases.

### 3 Divergent system

This section demonstrates the data assimilation behavior for a divergent system on the example of the 40-dimensional Lorenz-  
 100 96 model. We first introduce the model before we look into four characteristic different cases.

#### 3.1 Lorenz-96

The Lorenz-96 model (Lorenz, 1996) is an artificial model and cannot be derived from any dynamic equation (Lorenz, 2005). It can be interpreted as an unspecified scalar quantity  $x$  in a one dimensional atmosphere on a latitude circle and was defined in a study on predictability (Lorenz, 1996).

105 The governing equations are a set of coupled ordinary differential equations:

$$\frac{dx_i}{dt} = (x_{i+1} - x_{i-2})x_{i-1} - x_i + F, \quad i \in [1, 2, \dots, J] \quad (7)$$

with constant forcing  $F$ , periodic boundaries ( $x_{J+1} = x_1$ ) and dimension  $J$ . The dimension is often chosen as  $J = 40$ , which we also do in this study. Even though the system is not derived from physical principles, it shares certain properties of large atmospheric models (Lorenz and Emanuel, 1998). The quadratic terms represent advection and conserve the total energy, while  
 110 the linear term decreases the total energy comparable to dissipation. The constant  $F$  represents external forcing and prevents the system's total energy from decaying to zero. The value is often chosen as  $F = 8$  (Lorenz and Emanuel, 1998).

The Lyapunov exponent quantifies ~~the local speed of separation of two~~ how fast two initially infinitesimal close trajectories will separate. Analyzing the ~~averaged~~-leading Lyapunov exponent for  $F = 8$  shows a doubling time of ~~0.42~~  $\tau_d = 0.42$  units for the distance between two initially infinitesimally close neighboring states (Lorenz and Emanuel, 1998). ~~However, the growth~~

115 ~~rate in a short interval can be considerably larger or smaller. A local linear stability analysis shows that the Lorenz-96 model has~~  
~~13 positive Lyapunov exponents (Lorenz and Emanuel, 1998). This means that 13 directions of the eigenbasis are divergent,~~  
~~while the other 27 directions are convergent.~~

Increasing the forcing leads to a more divergent system. ~~For, for instance  $\tau_d = 0.3$  for  $F = 10$  the Lorenz-96 model has~~  
~~14 positive Lyapunov exponents (instead of 13). Furthermore, the doubling time, decreases from 0.42 to 0.3 (Lorenz, 1996),~~  
120 ~~which also decreases the (Lorenz, 1996). With  $\tau_d$  decreasing, so does the~~ predictability of the system.

### 3.2 Characteristic cases

The model is solved using a fourth order Runge-Kutta method with a time step of  $\Delta t = 0.01$ . The behavior of the EnKF on a divergent system is investigated through four different cases (DC1-4).

The initial condition for the synthetic truth for all cases is generated by running the model until time 2000 from an initial state  
125  $x_i = 4.0 \forall i \in [1, 2, \dots, 39]$  and  $x_{40} = 4.001$ , with the typical value  $F = 8$  for the forcing parameter. The final state of this run  
is used as the synthetic true initial state for all cases. This ensures that the state is on the attractor without the initial transient  
phase. The initial ensemble for the data assimilation runs is generated by perturbing the true initial state with a Gaussian  
distribution  $\mathcal{N}(0, 1)$ .

Synthetic observations are generated in all 40 dimensions by a forward run until time 4, using the true value and perturbing  
130 it with a Gaussian distribution with a zero mean and a standard deviation of  $\sigma_{\text{obs}} = 1.0$ . For cases DC1 and DC2 observations  
are generated at 8 different times with an observation interval of  $\Delta t_{\text{obs}} = 0.5$ . This observation interval is chosen rather large  
to ensure a large divergence of the system. For cases DC3 and DC4 observations are generated at 80 different times with an  
observation interval of  $\Delta t_{\text{obs}} = 0.05$ . This interval is often used in other studies (e.g. Nakano et al., 2007; van Leeuwen, 2010;  
Poterjoy, 2016).

#### 135 3.2.1 Divergent case 1 (DC1) – state estimation, true parameter

In this case, the ensemble is propagated with the same parameter ( $F = 8$ ) as the synthetic truth. Figure 1a shows the time  
development of one state dimension of the Lorenz-96 model (top panel) and the ensemble variance of this state dimension  $\sigma_{\text{dim}}^2$   
together with the mean variance over all dimensions  $\sigma^2$  (bottom panel). The ensemble has a sufficient ensemble spread such  
that the EnKF is able to correct the states to follow the truth.

140 The mean ensemble spread  $\sigma^2$  increases exponentially between two observations. At each observation, the EnKF updates  
the ensemble and the variance decreases correspondingly.

The behavior of  $\sigma_{\text{dim}}^2$  differs from the behavior of  $\sigma^2$ . During the forecast,  $\sigma_{\text{dim}}^2$  sometimes increases, decreases or stays  
approximately constant. This occurs because the Lorenz-96 model is bounded and has, therefore, convergent and divergent  
directions.

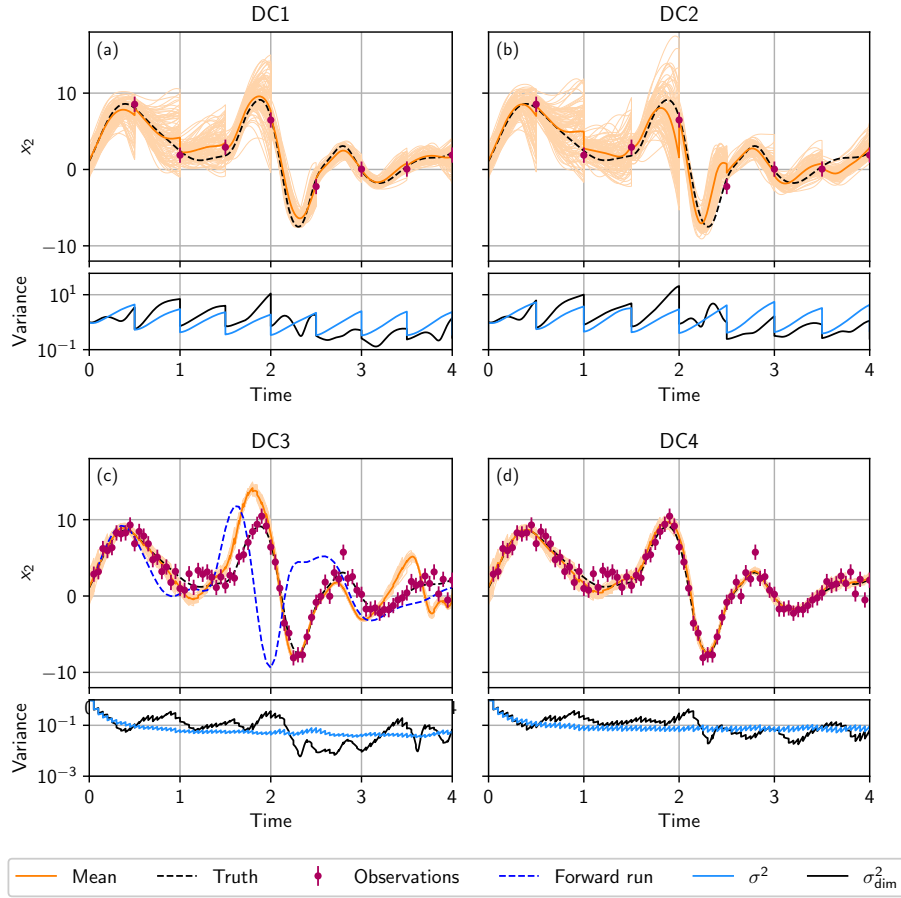

**Figure 1.** State estimation in a divergent system. (a): Divergent case 1 (DC1), the ensemble is propagated with the same parameter as the truth ( $F = 8$ ). (b): Divergent case 2 (DC2), the ensemble is propagated with  $F = 10$  instead. (c): Divergent case 3 (DC3), the ensemble is propagated with  $F = 10$  and the observation interval is reduced to  $\Delta t_{\text{Obs}} = 0.05$ . (d): Divergent case 4 (DC4), the parameter error is represented by the ensemble using  $\mathcal{N}(10, 2^2)$  for the reduced observation interval of  $\Delta t_{\text{Obs}} = 0.05$ . Top panels : The ensemble mean (orange line) and the ensemble (light orange lines) in the data assimilation run for state dimension 2 together with the observations (purple), generated from the truth (black dashed line). (c) additionally shows a single forward run (blue dashed line) using a wrong parameter  $F = 10$  starting from the true initial condition. Bottom panels: Mean variance  $\sigma^2$  (light blue line) of the ensemble over all dimensions and variance  $\sigma_{\text{dim}}^2$  (black line) of state dimension 2.

### 145 3.2.2 Divergent case 2 (DC2) – state estimation, wrong parameter

In this case, the ensemble is propagated with a wrong parameter of  $F = 10$  instead of  $F = 8$  (Fig. 1b), which was used to generate the observations. Therefore, the ensemble is propagated with a model that is more divergent than the synthetic truth.

Compared to DC1 (Fig. 1a, bottom panel),  $\sigma^2$  and  $\sigma_{\text{dim}}^2$  increase faster and the ensemble spread reaches higher values, which shows the increased divergence of the system. Propagating the ensemble with this different model leads to a larger deviation of

150 the ensemble mean from the truth (see Fig. 1b, top panel) than in DC1. However, the divergent nature of the model ensures a sufficient ensemble spread such that the state can be corrected towards the truth and the wrong parameter is compensated. This leads to a worsened but still good estimation of the truth without filter divergence.

### 3.2.3 Divergent case 3 (DC3) – state estimation, small observation interval, wrong parameter

The case is similar to DC2 except that the observation interval is reduced to  $\Delta t_{\text{Obs}} = 0.05$ . The high frequency of analysis steps, 155 where the Kalman update reduces the variance in the ensemble, prevents the Lorenz-96 model to develop enough divergence to increase the ensemble spread sufficiently (see Fig. 1ac, bottom panel). Although the ensemble is propagated with a more divergent model ( $F = 10$ ), the divergence is not sufficient to encompass the model error due to the wrong parameter and the filter can degenerate (see Fig. 1c, top panel). This is in contrast to DC2, where the Kalman filter can successfully estimate the state. However, the comparison with the forecast of the true initial state using the wrong parameter shows that the EnKF is able 160 to improve the state significantly.

### 3.2.4 Divergent case 4 (DC4) – state estimation, small observation interval, represented error

In divergent case 4 (DC4), the observation interval is, as in DC3, reduced to  $\Delta t_{\text{Obs}} = 0.05$ . The parameter error is represented by the ensemble by assigning each ensemble member a different parameter  $F$ . The forcing parameter  $F$  is drawn from a Gaussian distribution  $\mathcal{N}(10, 2^2)$ , such that the true value lies within one standard deviation .

165 Representing the error increases  $\sigma^2$  only slightly (Fig. 1d, bottom panel) compared to DC3, but the minimal variance of  $\sigma_{\text{dim}}^2$  has higher values. This change is sufficient to help the filter such that it does not degenerate (Fig. 1d, top panel). Representing the parameter error in the case of frequent observations can prevent filter degeneracy.

## 4 Convergent system

This section demonstrates the data assimilation behavior for a convergent system on the example of soil water flow. We again 170 first introduce the model before we look into four characteristic cases.

### 4.1 Soil water flow

Water flow in an unsaturated porous medium can be described by the Richards equation:

$$\partial_t \theta - \nabla \cdot [K(\theta) [\nabla h_m(\theta) - 1]] = 0, \quad (8)$$

where  $\theta (-)$  is the volumetric water content,  $K (\text{LT}^{-1})$  is the isotropic hydraulic conductivity, and  $h_m (\text{L})$  is the matric head.

175 To close Eq. 8 soil hydraulic material properties are necessary, which specify the dependency of the matric head and the hydraulic conductivity on the water content. We use the Mualem-van Genuchten parametrisation (Mualem, 1976; Van Genuchten, 1980) in its simplified form:

$$K(\Theta) = K_w \Theta^\tau \left[ 1 - \left[ 1 - \Theta^{n/[n-1]} \right]^{1-1/n} \right]^2, \quad (9)$$

$$h_m(\Theta) = \frac{1}{\alpha} \left[ \Theta^{-n/[n-1]} - 1 \right]^{1-1/n}, \quad (10)$$

180 with the saturation  $\Theta(-)$

$$\Theta := \frac{\theta - \theta_r}{\theta_s - \theta_r}. \quad (11)$$

The parameter  $\theta_s(-)$  is the saturated water content and  $\theta_r(-)$  is the residual water content. The matric head  $h_m$  is scaled with the parameter  $\alpha$  ( $\text{L}^{-1}$ ) that can be related to the inverse air entry value. The parameter  $K_w$  ( $\text{L T}^{-1}$ ) is the saturated hydraulic conductivity,  $\tau(-)$  a tortuosity factor and  $n(-)$  is a shape parameter. Equation (9) and Eq. (10) describe the sub-scale physics  
185 with six parameters for a homogeneous soil.

## 4.2 Characteristic cases

The behavior of the EnKF on a convergent system is investigated through four different cases (CC1-4). For the case studies, a one-dimensional homogeneous soil is used with an extent of 1 m. The Richards equation is solved using MuPhi (Ippisch et al., 2006) with a spatial resolution of 1 cm, which results in a 100-dimensional water content state.

190 For the true trajectories and the observations, parameters for a loamy sand by Carsel and Parrish (1988) are used:  $\theta_s = 0.41$ ,  $\theta_r = 0.057$ ,  $\tau = 0.5$ ,  $n = 2.28$ ,  $\alpha = -12.4 \text{ m}^{-1}$ , and  $K_w = 4.00 \cdot 10^{-5} \text{ m s}^{-1}$ . For the lower boundary, a Dirichlet condition with zero potential (groundwater table) is set and for the upper boundary a constant infiltration over the whole observation time with a flux of  $5 \cdot 10^{-7} \text{ m s}^{-1}$  is used.

Initially, the system is in hydraulic equilibrium. The infiltration boundary condition leads to a downward propagating infiltration front increasing the water content. Four [time domain reflectometry \(TDR\)-like](#) water content observations are generated  
195 equidistantly at depths of (0.2, 0.4, 0.6, 0.8) m. The observation error is chosen to be  $\sigma_{\text{obs}} = 0.007$  (e.g., Jaumann and Roth, 2017). Observations are taken hourly for a duration of 30 h.

To generate the initial ensemble, the ensemble mean [of the water content state](#) is perturbed by a correlated multivariate Gaussian distribution [using a Cholesky decomposition to create an ensemble that corresponds to a predefined covariance matrix \(e.g., Berg et al., 2019\)](#). The main diagonal of ~~the covariance matrix~~ [this covariance matrix of the ensemble](#) is  $0.003^2$ .  
200 The off-diagonal entries are determined by multiplying the variance on the main diagonal with the ~~Gaspari and Cohn function~~ [\(Gaspari and Cohn, 1999\) the fifth-order piecewise rational function by Gaspari and Cohn \(1999\)](#) using a length scale of  $c = 10 \text{ cm}$ . This ensures a [spatially](#) correlated initial state, which increases the diversity of the ensemble. If instead uncorrelated Gaussian random numbers with a zero mean were used, the dissipative component of the system would lead to a fast dissipation  
205 of the perturbation [in space for each individual ensemble member](#).

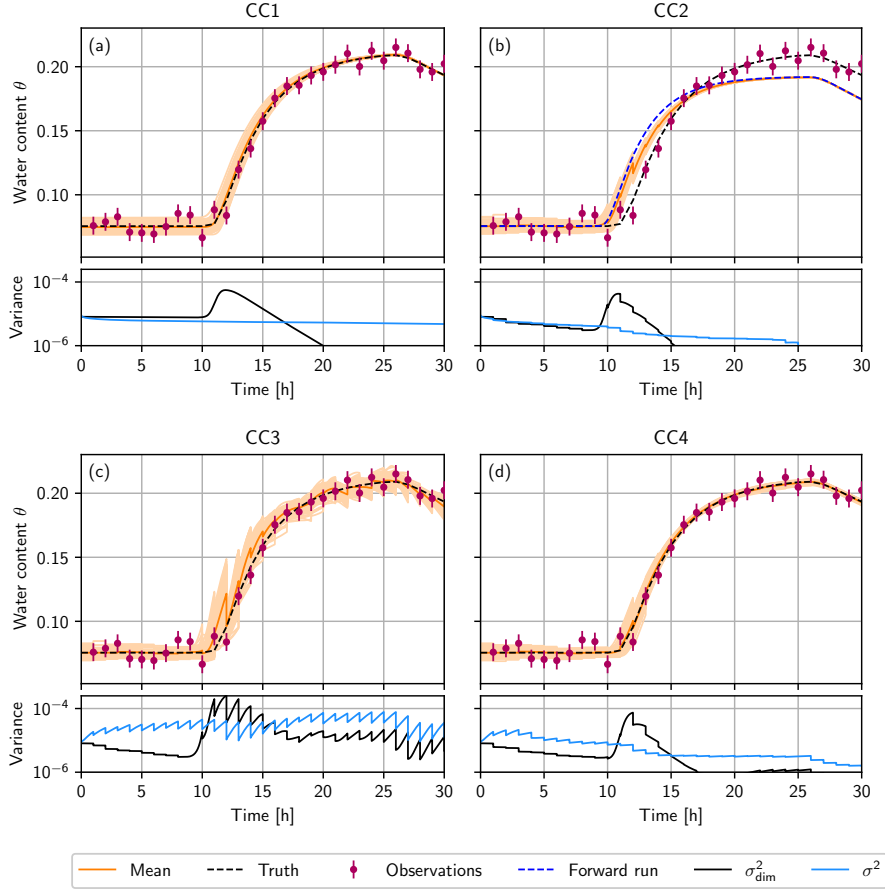

**Figure 2.** (a): Convergent case 1 (CC1): forward run without data assimilation, using an interpolated initial condition. In the other three cases the truth as used to generate the initial ensemble. (b): Convergent case 2 (CC2): the ensemble is propagated with  $n = 2.68$  instead of  $n_{\text{true}} = 2.28$  and the state is estimated. (c): Convergent case 3 (CC3): the parameter error is represented by the ensemble using  $\mathcal{N}(2.68, 0.4^2)$  and the state is estimated. (d): Convergent case 4 (CC4): simultaneous state and parameter estimation. Top panels: The ensemble mean (orange) and the ensemble (light orange lines) during the forward run at the depth of the uppermost observation (20 cm). The truth, which is used to generate the observations (purple), is shown as a black dashed line. (b) additionally shows a single forward run (blue dashed line) using a wrong parameter  $n = 2.68$  starting from the true initial condition. Bottom panels: Mean variance  $\sigma^2$  (light blue line) of the ensemble over all dimensions and variance  $\sigma_{\text{dim}}^2$  (black line) at the depth of 20 cm.

#### 4.2.1 Convergent case 1 (CC1) – no estimation

In this case no data assimilation is used and the ensemble is propagated with the true model. The initial conditions for the ensemble members are based on an on the linearly interpolated observations at time zero. This approximated state is used as the ensemble mean for the EnKF. This state is then perturbed by a correlated multivariate Gaussian distribution such that the spread of the initial ensemble is sufficient to represent the uncertainty of the water content in most parts.

The temporal development of the water content at 20 cm depth, the position of the uppermost observation, is shown in Fig. 2a (top panel). The initially broad ensemble slowly collapses to the truth.

The ensemble variance in this depth  $\sigma_{\text{dim}}^2$  increases when the infiltration front reaches 20 cm. Because of the nonlinear conductivity function (Fig. 9), the different initial water contents lead to a different arrival time of the infiltration front at the first observation position. This leads to an increase in the ensemble spread.

After the increase of the water content, the ensemble collapses fast since the hydraulic conductivity increases with the water content, which leads to a fast convergence of the different ensemble members to the truth due the convergent nature of the model. The variance over all dimensions  $\sigma^2$  decreases slowly and approaches zero over time. If the system is started with a higher water content instead of equilibrium, this collapse will occur faster.

This case shows that the predictability for a perfect convergent system is infinite (in contrast to divergent systems, that only have a finite limit of predictability even if the model including boundary conditions is perfectly known). After a transient phase, the states converge to the truth (Kalnay, 2003). A perfect model is not what we encounter in reality, however.

#### 4.2.2 Convergent case 2 (CC2) – state estimation, wrong parameter

In this case, the state is estimated with the EnKF but the ensemble is propagated with a wrong parameter. Instead of  $n_{\text{true}} = 2.28$ ,  $n = 2.68$  is chosen. The mean for the initial state is chosen as the true initial water content.

In Fig. 2b (top panel) the temporal development of the water content in the depth of the uppermost observation (20 cm) is shown. A larger  $n$  results in an earlier arrival of the infiltration front at the depth of 20 cm for the ensemble than for the truth. The EnKF tries to correct the ensemble but fails because its variance is too small and cannot represent the truth. Due to the convergent system,  $\sigma^2$  decreases constantly while  $\sigma_{\text{dim}}^2$  decreases fast to zero after the infiltration front reaches the depth of 20 cm (see Fig. 2b, bottom panel). This convergence leads to a false trust in the model and the filter degenerates. Compared to a forward run without data assimilation, the EnKF can only improve the state estimation for a short time when the water content rises due to the infiltration front. Soon after, the ensemble coincides with the free forward run and the estimated state shows no advantage any more.

This case illustrates that a wrong parameter in a convergent system can lead to filter degeneration. This is in direct contrast to DC2 (Fig. 1b), where the filter is still able to estimate the state. The behavior also differs from DC3 (Fig. 1c), where the observation interval in the Lorenz-96 model is too short such that it cannot develop its full divergent behavior. There the filter can also degenerate for a wrong parameter, but the data assimilation is still able to improve the estimation compared to a free forward run, since the ensemble never collapses entirely.

#### 4.2.3 Convergent case 3 (CC3) – state estimation, represented error

In this case, the parameter error is represented with the ensemble but the parameter is not estimated. Each ensemble member has a different parameter  $n$ . The parameters are Gaussian distributed with  $\mathcal{N}(2.68, 0.4^2)$  such that the truth lies within one standard deviation. Since the model error is known in this synthetic case we can create an ensemble that represents the model



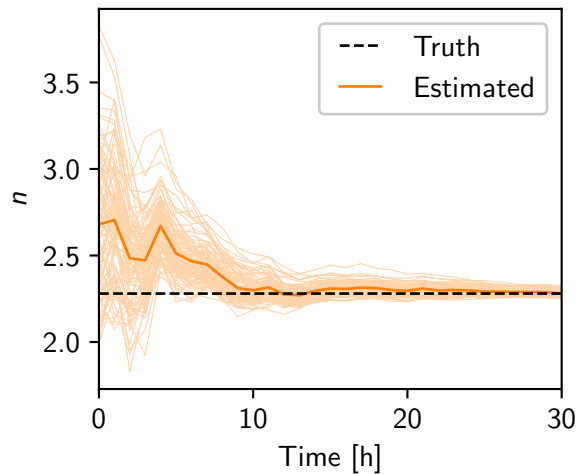

**Figure 3.** Estimation of parameter  $n$  in convergent case 4 (CC4). The ensemble mean is shown in orange and the ensemble in light orange. The truth is a black dashed line.

error adequately. Note, that this is more difficult or even impossible in a real-world system. The mean for the initial state is chosen as the true initial water content.

245 Figure 2c (top panel) shows the temporal development of the water content in a depth of 20 cm. The infiltration front reaches this depth at different times due to the different parameter  $n$  for each ensemble member. This increases the variance in the ensemble both, in this depth and overall (see Fig. 2c, bottom panel). The variance increases rapidly between the observations, similar to the divergent cases. This way, the ensemble spread stays large enough such that the EnKF can correct the states. The ensemble can follow and represent the truth. This ~~behaviour~~behavior can also be observed for the divergent case DC4 with a  
250 short observation interval (Fig. 1d).

Representing the model error adds a divergent component to the ensemble for a convergent model. This allows the EnKF to correct the state and follow the truth. However, the predictability of the system decreases since each ensemble member converges to a different fixed point apart from the truth. To increase the predictability, parameter estimation is necessary.

#### 4.2.4 Convergent case 4 (CC4) – state and parameter estimation

255 In this case, the error in the parameter  $n$  is not only represented but also estimated as part of the augmented state. The initial parameter set is, as in CC3, Gaussian distributed with  $\mathcal{N}(2.68, 0.4^2)$  such that the truth is located within one standard deviation. Again, the mean for the initial state is chosen as the true initial water content.

The estimation of  $n$  is shown in Fig. 3. The ensemble converges to the truth in a fast way because only one parameter is estimated, so every deviation from the truth is mainly caused by this parameter.

260 The mean variance  $\sigma^2$  increases initially (Fig. 2d, bottom panel), because in the beginning the parameter has not been sufficiently improved such that the ensemble members still have different  $n$ . This leads to a divergent ensemble in state space during the infiltration similar to CC3. While the parameter is estimated, the variance of the ensemble decreases fast and the convergent property of the system becomes dominant.

The temporal development of the water content in a depth of 20 cm is shown in Fig. 2d (top panel). In contrast to CC3, the  
265 corrections of the EnKF to the state are much smaller. The mean of the parameter  $n$  comes close to the true value and the uncertainty of  $n$  decreases. This causes the forward propagation to come close to the true model as well. The propagation with an almost correct model supports the state estimation due to the convergent nature of the system which forces the state to the true value.

## 5 Discussion

270 For the divergent Lorenz-96 system, the EnKF is able to estimate the state for the true model as well as for the case with a wrong parameter. In a divergent system, the volume of the prior in phase space increases during forward propagation (Evensen, 1994). For the EnKF, this is directly connected to the ensemble spread, which increases rapidly between the observations. This prevents a collapse of the ensemble even in the presence of an unrepresented parameter error. However, if the observation interval is too small such that the system cannot develop its full divergent behavior, the EnKF leads to a decrease in the  
275 ensemble spread such that the filter degenerates in the case of an unrepresented parameter error. Nevertheless, the divergent behavior of the model prevents a complete collapse of the ensemble, so that the filter is still able to improve the state in a limited way.

In the convergent soil hydrological system, the volume of the prior distribution decreases during forward propagation such that the prior becomes more certain during the forward propagation even without an observation or data assimilation. For a  
280 perfect model, the predictability and state estimation in a convergent model are trivial. The initial ensemble will converge to the truth after some time, even with a rough approximation. In this case, data assimilation is not necessary.

In the case of model errors, in our study realized through a wrong parameter, the situation is different. The ensemble converges to a wrong state, the filter degenerates and data assimilation fails. Increasing the ensemble size can only improve the performance marginally since all ensemble members converge to the same fixed point.

285 Representing the parameter error by assigning each ensemble member a different parameter, increases the divergence of the system and the filter is able to estimate the state again. Between the observations, the ensemble spread increases rapidly because the ensemble members diverge to different fixed points apart from the truth. This results in a finite predictability. By representing the parameter error, the Richards equation behaves more similar to the divergent Lorenz-96 model. In the case of a convergent system, it is necessary to represent the parameter error, otherwise the ensemble collapses.

290 To increase the predictability of the system again, it is necessary to not only represent but also reduce uncertainties in the parameter. In synthetic cases without model structural errors, the convergent property of the system supports the state estimation and the predictability increases, if the parameter estimation is successful. This shows the importance of parameter

estimation for convergent systems. For divergent systems parameter estimation also increases the predictability but only up to a point, because predictability is limited by the system's dynamics.

295 For the application of data assimilation to real data, model errors typically cannot be attributed to unknown parameters  
or uncertainties in boundary conditions alone, but also stem from model structural errors like a simplified representation of  
sub-scale physics or unrepresented processes in the dynamics. Uncertainties in parameters and boundary conditions can be  
represented in an ensemble, but representing model structural errors is challenging or can be impossible. For example, in  
hydrology, the model errors are typically ill-known (Li and Ren, 2011) and can vary both in space and time, which then can  
300 lead to filter degeneracy and biased parameter estimation (Berg et al., 2019). While divergent models can alleviate the effect of  
an unrepresented error within bounds, in a convergent system it is necessary to represent all relevant model errors sufficiently  
to prevent filter degeneracy and enable an optimal state and parameter estimation. ~~However, representing these model errors is~~  
~~challenging. For example in hydrology, the model errors are typically ill-known (Li and Ren, 2011) and can vary both in space~~  
~~and time, which then can lead to filter degeneracy and biased parameter estimation (Berg et al., 2019)~~Since this is challenging  
305 or even impossible, heuristic ways to address filter degeneracy are necessary.

~~Alternatively, inflation methods, can help~~A practical alternative to increase the ensemble spread and avoid filter degeneracy  
are inflation methods. For example, keeping a constant ensemble spread for the parameters can provide a sufficient spread in  
state space (Zhang et al., 2017). The advantage is that this approach is a model-specific inflation and avoids overamplification  
of spurious correlations (Constantinescu et al., 2007). The disadvantage is, that the EnKF is prevented from reducing the  
310 prediction uncertainty. This behavior is also shown in CC3. In this case, the ensemble spread in the parameter space adds a  
divergent component to the ensemble that results in an increased ensemble spread in state space and prevents filter degeneracy.

Multiplicative inflation increases the ensemble spread through an inflation factor (Anderson and Anderson, 1999). In a  
divergent system a small multiplicative inflation is sufficient to increase the existing ensemble spread. In a convergent system  
this requires a larger inflation and can lead to overinflation of spurious correlations (Constantinescu et al., 2007). To avoid  
315 this and to cope with spatial and temporal varying model errors, the use of more sophisticated adaptive inflation methods (e.g.  
Bauser et al., 2018; Gharamti, 2018) may be necessary in convergent systems.

~~Inflation~~Heuristic inflation methods cannot fully replace the representation of model errors and hence must be used judiciously.  
They can lead to overinflation of spurious correlations and can lead to biases in the estimation of parameters. If unrepresented  
model errors can be identified and are limited in space or time, these biases can be prevented by using a closed-eye period for  
320 the extent of the unrepresented model errors. In the closed-eye period, parameters are kept constant and only the state is esti-  
mated, which can require inflation methods for a successful state estimation. This enables an improved parameter estimation  
without compensating the unrepresented model dynamics though biased parameters outside of the closed-eye period, when and  
where uncertainties can be represented. The use of the closed-eye period in combination with the representation of relevant  
uncertainties has been demonstrated in hydrology (Bauser et al., 2016).

We demonstrated the difference and challenges of ensemble data assimilation for divergent and convergent systems on the example of the EnKF applied to the divergent Lorenz-96 model and a convergent soil water movement model based on the Richards equation.

Sequential ensemble data assimilation methods require a sufficient divergent part in the ensemble to maintain an adequate ensemble spread and prevent filter degeneration. In divergent systems this is inherent to the system. In convergent systems relevant model errors must be represented to increase the ensemble spread and add a divergent part to the ensemble to avoid filter degeneracy. If errors stem from unknown parameters, estimating the parameters improves state estimation. However, this will reduce the ensemble spread again and require the remaining relevant model errors to be represented. Since this can be challenging, increasing the model errors artificially, by limiting the reduction of parameter uncertainty or through inflation methods, can be required in convergent systems.

This paper highlights the challenges when transferring sequential ensemble data assimilation methods from divergent systems to convergent systems, which must be considered when applying data assimilation.

*Author contributions.* HHB and DB designed and implemented the presented study. DB performed and analyzed the simulations. All authors participated in continuous discussions. HHB and DB prepared the manuscript with contributions from KR. The presented results are based on the PhD thesis by DB.

*Competing interests.* The authors declare that they have no conflict of interest.

*Acknowledgements.* This research was funded by Deutsche Forschungsgemeinschaft (DFG) through project RO 1080/12-1. Daniel Berg was supported in part by the Heidelberg Graduate School of Mathematical and Computational Methods for the Sciences (HGS MathComp), funded by DFG grant GSC 220 in the German Universities Excellence Initiative. Hannes H. Bauser was supported in part by the Deutsche Forschungsgemeinschaft (DFG) through Project BA 6635/1-1.

## References

- Aksoy, A., Zhang, F., and Nielsen-Gammon, J. W.: Ensemble-based simultaneous state and parameter estimation in a two-dimensional sea-breeze model, *Monthly Weather Review*, 134, 2951–2970, <https://doi.org/10.1175/MWR3224.1>, 2006.
- Anderson, J. L. and Anderson, S. L.: A Monte Carlo implementation of the nonlinear filtering problem to produce ensemble assimilations and forecasts, *Monthly Weather Review*, 127, 2741–2758, [https://doi.org/10.1175/1520-0493\(1999\)127<2741:AMCIOT>2.0.CO;2](https://doi.org/10.1175/1520-0493(1999)127<2741:AMCIOT>2.0.CO;2), 1999.
- 350 Bauser, H. H., Jaumann, S., Berg, D., and Roth, K.: EnKF with closed-eye period – towards a consistent aggregation of information in soil hydrology, *Hydrology and Earth System Sciences*, 20, 4999–5014, <https://doi.org/10.5194/hess-20-4999-2016>, 2016.
- Bauser, H. H., Berg, D., Klein, O., and Roth, K.: Inflation method for ensemble Kalman filter in soil hydrology, *Hydrology and Earth System Sciences*, 22, 4921–4934, <https://doi.org/10.5194/hess-22-4921-2018>, 2018.
- 355 Berg, D., Bauser, H. H., and Roth, K.: Covariance resampling for particle filter – state and parameter estimation for soil hydrology, *Hydrology and Earth System Sciences*, 23, 1163–1178, <https://doi.org/10.5194/hess-23-1163-2019>, 2019.
- Bocquet, M., Elbern, H., Eskes, H., Hirtl, M., Žabkar, R., Carmichael, G. R., Flemming, J., Inness, A., Pagowski, M., Pérez Camacho, J. L., Saide, P. E., San Jose, R., Sofiev, M., Vira, J., Baklanov, A., Carnevale, C., Grell, G., and Seigneur, C.: Data assimilation in atmospheric chemistry models: current status and future prospects for coupled chemistry meteorology models, *Atmospheric Chemistry and Physics*, 15, 5325–5358, <https://doi.org/10.5194/acp-15-5325-2015>, 2015.
- 360 Burgers, G., van Leeuwen, P. J., and Evensen, G.: Analysis scheme in the ensemble Kalman filter, *Monthly Weather Review*, 126, 1719–1724, [https://doi.org/10.1175/1520-0493\(1998\)126<1719:ASITEK>2.0.CO;2](https://doi.org/10.1175/1520-0493(1998)126<1719:ASITEK>2.0.CO;2), 1998.
- Carmichael, G. R., Sandu, A., Chai, T., Daescu, D. N., Constantinescu, E. M., and Tang, Y.: Predicting air quality: Improvements through advanced methods to integrate models and measurements, *Journal of Computational Physics*, 227, 3540 – 3571, <https://doi.org/https://doi.org/10.1016/j.jcp.2007.02.024>, predicting weather, climate and extreme events, 2008.
- 365 Carrassi, A., Bocquet, M., Bertino, L., and Evensen, G.: Data assimilation in the geosciences: An overview of methods, issues, and perspectives, *Wiley Interdisciplinary Reviews: Climate Change*, 9, e535, <https://doi.org/10.1002/wcc.535>, 2018.
- Carsel, R. F. and Parrish, R. S.: Developing joint probability distributions of soil water retention characteristics, *Water Resources Research*, 24, 755–769, <https://doi.org/10.1029/WR024i005p00755>, 1988.
- 370 Constantinescu, E. M., Sandu, A., Chai, T., and Carmichael, G. R.: Ensemble-based chemical data assimilation. I: General approach, *Quarterly Journal of the Royal Meteorological Society*, 133, 1229–1243, <https://doi.org/10.1002/qj.76>, 2007.
- Edwards, C. A., Moore, A. M., Hoteit, I., and Cornuelle, B. D.: Regional ocean data assimilation, *Annual Review of Marine Science*, 7, 21–42, <https://doi.org/10.1146/annurev-marine-010814-015821>, 2015.
- Evensen, G.: Sequential data assimilation with a nonlinear quasi-geostrophic model using Monte Carlo methods to forecast error statistics, *Journal of Geophysical Research: Oceans*, 99, 10 143–10 162, <https://doi.org/10.1029/94JC00572>, 1994.
- 375 Gaspari, G. and Cohn, S. E.: Construction of correlation functions in two and three dimensions, *Quarterly Journal of the Royal Meteorological Society*, 125, 723–757, <https://doi.org/10.1002/qj.49712555417>, 1999.
- Gharamti, M. E.: Enhanced adaptive inflation algorithm for ensemble filters, *Monthly Weather Review*, 146, 623–640, <https://doi.org/10.1175/MWR-D-17-0187.1>, 2018.
- 380 Han, X., Hendricks Franssen, H.-J., Montzka, C., and Vereecken, H.: Soil moisture and soil properties estimation in the Community Land Model with synthetic brightness temperature observations, *Water Resources Research*, 50, 6081–6105, <https://doi.org/10.1002/2013WR014586>, 2014.

- Hendricks Franssen, H. J. and Kinzelbach, W.: Real-time groundwater flow modeling with the ensemble Kalman filter: Joint estimation of states and parameters and the filter inbreeding problem, *Water Resources Research*, 44, <https://doi.org/10.1029/2007WR006505>, 2008.
- 385 Houtekamer, P. L. and Zhang, F.: Review of the ensemble Kalman filter for atmospheric data assimilation, *Monthly Weather Review*, 144, 4489–4532, <https://doi.org/10.1175/MWR-D-15-0440.1>, 2016.
- Ippisch, O., Vogel, H.-J., and Bastian, P.: Validity limits for the van Genuchten–Mualem model and implications for parameter estimation and numerical simulation, *Advances in Water Resources*, 29, 1780–1789, <https://doi.org/10.1016/j.advwatres.2005.12.011>, 2006.
- Jaumann, S. and Roth, K.: Effect of unrepresented model errors on estimated soil hydraulic material properties, *Hydrology and Earth System Sciences*, 21, 4301–4322, <https://doi.org/10.5194/hess-21-4301-2017>, 2017.
- 390 Kalman, R. E.: A new approach to linear filtering and prediction problems, *Journal of basic Engineering*, 82, 35–45, <https://doi.org/10.1115/1.3662552>, 1960.
- Kalnay, E.: *Atmospheric modeling, data assimilation and predictability*, Cambridge university press, 2003.
- Li, C. and Ren, L.: Estimation of unsaturated soil hydraulic parameters using the ensemble Kalman filter, *Vadose Zone Journal*, 10, 1205, <https://doi.org/10.2136/vzj2010.0159>, 2011.
- 395 Liu, Y. and Gupta, H. V.: Uncertainty in hydrologic modeling: Toward an integrated data assimilation framework, *Water Resources Research*, 43, <https://doi.org/10.1029/2006WR005756>, w07401, 2007.
- Liu, Y., Weerts, A. H., Clark, M., Hendricks Franssen, H.-J., Kumar, S., Moradkhani, H., Seo, D.-J., Schwanenberg, D., Smith, P., van Dijk, A. I. J. M., van Velzen, N., He, M., Lee, H., Noh, S. J., Rakovec, O., and Restrepo, P.: Advancing data assimilation in operational hydrologic forecasting: progresses, challenges, and emerging opportunities, *Hydrology and Earth System Sciences*, 16, 3863–3887, <https://doi.org/10.5194/hess-16-3863-2012>, 2012.
- 400 Lorenz, E. N.: Atmospheric predictability experiments with a large numerical model, *Tellus*, 34, 505–513, <https://doi.org/10.1111/j.2153-3490.1982.tb01839.x>, 1982.
- Lorenz, E. N.: Predictability: A problem partly solved, in: *Proc. Seminar on predictability*, vol. 1, 1996.
- 405 Lorenz, E. N.: Designing chaotic models, *Journal of the Atmospheric Sciences*, 62, 1574–1587, <https://doi.org/10.1175/JAS3430.1>, 2005.
- Lorenz, E. N. and Emanuel, K. A.: Optimal sites for supplementary weather observations: Simulation with a small model, *Journal of the Atmospheric Sciences*, 55, 399–414, [https://doi.org/10.1175/1520-0469\(1998\)055<0399:OSFSWO>2.0.CO;2](https://doi.org/10.1175/1520-0469(1998)055<0399:OSFSWO>2.0.CO;2), 1998.
- Luo, Y., Ogle, K., Tucker, C., Fei, S., Gao, C., LaDeau, S., Clark, J. S., and Schimel, D. S.: Ecological forecasting and data assimilation in a data-rich era, *Ecological Applications*, 21, 1429–1442, <https://doi.org/10.1890/09-1275.1>, 2011.
- 410 Mualem, Y.: A new model for predicting the hydraulic conductivity of unsaturated porous media, *Water Resources Research*, 12, 513–522, <https://doi.org/10.1029/WR012i003p00513>, 1976.
- Nakano, S., Ueno, G., and Higuchi, T.: Merging particle filter for sequential data assimilation, *Nonlinear Processes in Geophysics*, 14, 395–408, <https://doi.org/10.5194/npg-14-395-2007>, 2007.
- Niu, S., Luo, Y., Dietze, M. C., Keenan, T. F., Shi, Z., Li, J., and III, F. S. C.: The role of data assimilation in predictive ecology, *Ecosphere*, 5, art65, <https://doi.org/10.1890/ES13-00273.1>, 2014.
- 415 Poterjoy, J.: A localized particle filter for high-dimensional nonlinear systems, *Monthly Weather Review*, 144, 59–76, <https://doi.org/10.1175/MWR-D-15-0163.1>, 2016.
- Rasmussen, J., Madsen, H., Jensen, K. H., and Refsgaard, J. C.: Data assimilation in integrated hydrological modeling using ensemble Kalman filtering: evaluating the effect of ensemble size and localization on filter performance, *Hydrology and Earth System Sciences*, 19, 2999–3013, <https://doi.org/10.5194/hess-19-2999-2015>, 2015.
- 420

- Reichle, R. H.: Data assimilation methods in the Earth sciences, *Advances in Water Resources*, 31, 1411 – 1418, <https://doi.org/10.1016/j.advwatres.2008.01.001>, hydrologic Remote Sensing, 2008.
- Ruiz, J. J., Pulido, M., and Miyoshi, T.: Estimating Model Parameters with Ensemble-Based Data Assimilation: A Review, *Journal of the Meteorological Society of Japan. Ser. II*, 91, 79–99, <https://doi.org/10.2151/jmsj.2013-201>, 2013.
- 425 Shi, Y., Davis, K. J., Zhang, F., Duffy, C. J., and Yu, X.: Parameter estimation of a physically based land surface hydrologic model using the ensemble Kalman filter: A synthetic experiment, *Water Resources Research*, 50, 706–724, <https://doi.org/10.1002/2013WR014070>, 2014.
- Stammer, D., Balmaseda, M., Heimbach, P., Köhl, A., and Weaver, A.: Ocean data assimilation in support of climate applications: Status and perspectives, *Annual Review of Marine Science*, 8, 491–518, <https://doi.org/10.1146/annurev-marine-122414-034113>, 2016.
- Van Genuchten, M. T.: A closed-form equation for predicting the hydraulic conductivity of unsaturated soils, *Soil science society of America journal*, 44, 892–898, <https://doi.org/10.2136/sssaj1980.03615995004400050002x>, 1980.
- 430 van Leeuwen, P. J.: Nonlinear data assimilation in geosciences: Fan extremely efficient particle filter, *Quarterly Journal of the Royal Meteorological Society*, 136, 1991–1999, <https://doi.org/10.1002/qj.699>, 2010.
- van Leeuwen, P. J., Cheng, Y., and Reich, S.: Nonlinear data assimilation, vol. 2, Springer, <https://doi.org/10.1007/978-3-319-18347-3>, 2015.
- Zhang, H., Hendricks Franssen, H.-J., Han, X., Vrugt, J. A., and Vereecken, H.: State and parameter estimation of two land surface models using the ensemble Kalman filter and the particle filter, *Hydrology and Earth System Sciences*, 21, 4927–4958, <https://doi.org/10.5194/hess-21-4927-2017>, 2017.
- 435 Zhang, Y., Bocquet, M., Mallet, V., Seigneur, C., and Baklanov, A.: Real-time air quality forecasting, part II: State of the science, current research needs, and future prospects, *Atmospheric Environment*, 60, 656 – 676, <https://doi.org/https://doi.org/10.1016/j.atmosenv.2012.02.041>, 2012.
