# Supplementary material for: Technical note: Sequential ensemble data assimilation in convergentand divergent systems
Source: Copernicus journal article supplement (doi:10.5194/hess-2020-668), 2021-02-17
Supplement: Supplementary file [file hess-2020-668-AC2-supplement.pdf]

## Answer to Review by Referee #2

**General comments:** *The technical note titled “Sequential ensemble data assimilation in convergent and divergent systems” written by Hannes Helmut Bauser et al. investigated the performance of data assimilation in convergent and divergent systems. Although the manuscript showed how a sequential data assimilation method (EnKF) works in two convergent and divergent systems, at the current version, manuscript only showed the results of different case studies without detailed explanation why we observed those results, which is crucial for technical studies. In addition, the manuscripts did not provide suggestions to improve the performance of data assimilation in convergent and divergent systems. In my opinion, it is better if the manuscript considers scenarios that use one or two techniques to maintain ensemble spread or to avoid convergence to wrong states in convergent systems as stated in the introduction section. Examples presented in the manuscript is ideal. Authors may consider examples that are nearer to the realistic cases.*

**Reply:** We thank the reviewer for the comments and recognizing our work. We have revised the manuscript accordingly and attached a file showing the differences. We refer to this file when giving line numbers in our response.

The aim of this technical note is to show the fundamental difference between convergent and divergent systems in ensemble data assimilation. In our understanding a technical note focuses on a specific constrained aspect, and is not an extensive assessment. We therefore chose two extreme cases in this study, that allow to illustrate these differences, but these are simplified compared to real-world applications. Nevertheless, they highlight the key aspects that also have to be considered in the real-world applications. The different systems themselves and their individual performance with data assimilation have been studied in the literature and is not part of this note.

This note focuses on creating understanding of the fundamental behavior and differences. Solutions to improve the performance of data assimilation will be problem specific. This can also be seen in the wide range of different inflation methods (one possible heuristic solution that have limitations) that are applied. Again, the application of such methods has been studied for the individual systems. Specific results found may not be transferable to a different system.

We have extended our description to clarify the choice of the illustrative cases. We have also improved explanations throughout the manuscript (see also responses to specific comments below).

Lines 69-75: “We investigate and demonstrate the different challenges, that illustrate for example the different requirements for inflation methods, using the ensemble Kalman filter (Evensen, 1994; Burgers et al., 1998). The divergent case is illustrated using the Lorenz-96 model (Lorenz, 1996), while for the convergent case, a soil hydrological system described by Richards’ equation is used. Naturally, these are highly simplified models compared to real-world applications. Still, they demonstrate key aspects that also have to be addressed in more complicated situations. The specific adjustments applied there depend on the particular model. Our focus here is on the fundamentals, not on the wide range of specifics. ”

Lines 106-107: “This section demonstrates the data assimilation behavior for a di-

vergent system on the example of the 40-dimensional Lorenz-96 model, which has been widely used to test data assimilation methods in atmospheric sciences (e.g., Li et al., 2009).”

***Specific comments:***

- *Introduction: Evidences on why we need to assess the performance of data assimilation in convergent and divergent system should be more clearly stated (why we need to do this study). How convergent/divergent system impacts on the effectiveness of data assimilation? What is the disadvantage of divergent systems (slowly converge to the truth state?) ? Provide more examples of convergent/divergent systems in hydrology and geosciences.*

**Reply:** In the data assimilation literature geophysical systems are typically not distinguished between convergent and divergent. To better introduce this differentiation we have included a new Fig. 1 to show the qualitative differences between the two systems. In the introduction, the motivation for this study is then grounded on several indicators that the differentiation between convergent and divergent systems may yield interesting insights. (i) data assimilation is applied to convergent and divergent systems (ii) the development of data assimilation methods is mainly driven by the atmospheric sciences (iii) the observation that in convergent systems sometimes rather dramatic choices are made that ensure a sufficient ensemble spread (e.g. keep parameter uncertainty constant). The goal of this paper is then to provide basic insights into this difference and emphasize the need and bring additional attention to the challenges from model structural errors in data assimilation in convergent systems (which is a finding of this paper and rather a fundamental challenge to be addressed by future research).

To make this motivation clearer in the introduction we made several changes:

Lines 21-22 and Fig. 1: “In this study we distinguish geophysical systems between divergent and convergent systems, depending on the development of two initially nearby states (Fig. 1).”

Lines 26-27: “However, this is only true for perfect models, which is usually not the case for geophysical systems. This can lead to a bias with convergence to a wrong state.”

Lines 32-35: “While weather forecasting or oceanography are divergent systems, several geophysical system, such as soil hydrology or chemical transport are convergent systems. In ensemble data assimilation methods, if uncertainties are only represented through an ensemble of states, this leads to decreasing uncertainties over time, which favors filter degeneration.”

Lines 37-38: “The application of data assimilation when coupling a divergent and a convergent model, for example in coupled chemistry meteorology models, may lead to potentially new difficulties (Bocquet et al., 2015).”

Lines 62-64: “Similarly, Constantinescu et al. (2007) showed that an atmospheric chemical transport model required much stronger inflation than reported in the meteorological literature and showed better results for a model specific inflation, where the key parameters are perturbed to achieve an increased spread in the state.”

Lines 69-71: “We investigate and demonstrate the different challenges, that illustrate for example the different requirements for inflation methods, using the ensemble Kalman filter (Evensen, 1994; Burgers et al., 1998).”

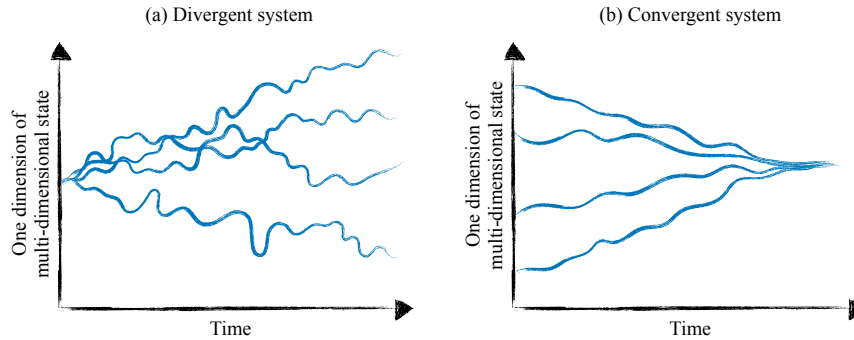

Figure 1: Dynamics of a generic divergent and convergent dynamic system with different initial states. Both panels show a single state dimension of a multi-dimensional system. In the divergent system, initially infinitesimally close states drift apart, while in the convergent system initially apart states converge.

- Section 3 and 4: Provide more technical explanation of the obtained results and show the quantitative criteria (NSE, relative error, correlation coefficient, etc.) that compare results obtained with data assimilation and with forecast (open loop), especially explain the changes of ensemble variance with time. Why the initial condition for data assimilation was not set to be different from the true one? What is the observation values used for assimilation and their corresponding errors?

**Reply:** We have extended the explanations for the observed results in sections 3 and 4. The goal of this manuscript is to provide insight and understanding on the differences between convergent and divergent systems with regard to data assimilation. Therefore, we focus on the qualitative features in the data assimilation. By deliberately not providing summarizing statistics, we guide the reader to actually look at the figures to understand the behavior.

We provide the RMSE for the reviewer. The RMSE for the divergent cases of the analysis state to the synthetic truth in the shown state dimension at measurement times are DC1: 0.3, DC2: 0.7, DC3: 2.2, DC4: 0.4. Comparing the free forward run (with a wrong parameter, which is the same for DC2-DC4) to the synthetic truth at the 8 measurement times as in DC2, leads to an RMSE of 6.8, comparing truth and forward run at the 80 measurement times as in DC3 and DC4 yields an RMSE of 5.4. The numbers confirm the qualitative observations. The RMSE for the convergent cases of the analysis state to the synthetic truth in the shown state dimension at measurement times are CC1: 0.001, CC2: 0.012, CC3: 0.003, and CC4: 0.001. Comparing the free forward run (with a wrong parameter, which is the same for CC2-CC4) to the synthetic

truth at the 30 measurement times yields an RMSE of 0.014. Again, this agrees with the qualitative observations.

The variances are shown in the lower panel for each case in Figures 2 and 3 (former Figures 1 and 2). The overall behavior is that the variance increases during the forecast for the divergent system, while it decreases for the convergent system. The analysis step reduces the variance at the measurement times.

To illustrate the behavior of the divergent system, it was not necessary to start from a biased initial condition. This ensures to keep the chosen examples more simple and understandable.

We have made the following changes to extend the explanations:

Line 94: “By combining the information from measurement and model, the uncertainty in the analysis ensemble is decreased.”

Lines 130-132: “The behavior of the EnKF on a divergent system is investigated through four different cases (DC1-4), which are purposely designed simple to illustrate the behavior concisely. For all cases, the model is solved using a fourth order Runge-Kutta method with a time step of  $\Delta t = 0.01$ .”

Lines 145-146: “Uncertainty only stems from the uncertainty in the initial condition.”

Lines 148-149: “Due to the divergent nature of the model, the ensemble spread increases between observations and the ensemble has a sufficient spread such that the EnKF is able to correct the states to follow the truth.”

Lines 156-157: “In this case, in order to investigate the impact of an unrepresented model error, the ensemble is propagated with a wrong parameter of  $F = 10$  instead of  $F = 8$  (Fig. 2b), which was used to generate the observations.”

Lines 165-167: “The high frequency of analysis steps, where the Kalman update reduces the variance in the ensemble, prevents the Lorenz-96 model to develop enough divergence to increase the ensemble spread sufficiently in the short time intervals in between (see Fig. 2c, bottom panel).”

Lines 177-178: “This increase is sufficient to help the filter such that it does not degenerate (Fig. 2d, top panel). Representing the parameter error in the ensemble in the case of frequent observations can prevent filter degeneracy.”

Lines 223-224: “Due to the convergent behavior of the model in combination with the true representation, the initially broad ensemble converges to the truth, even though the initial condition was not represented accurately.”

Lines 342-344: “Sequential ensemble data assimilation methods require a sufficient divergent part in the ensemble to maintain an adequate ensemble spread and prevent filter degeneration. In divergent systems this is inherent to the system, provided that observation intervals and divergence times match.”

In regard to the observation values and errors, the model settings for the synthetic truth are given in subsections 3.2 and 4.2. The details for observations and their errors are already stated in lines 138-143: “Synthetic observations are generated in all 40 dimensions by a forward run until time 4, using the true value and perturbing it with

a Gaussian distribution with a zero mean and a standard deviation of  $\sigma_{\text{obs}} = 1.0$ . For cases DC1 and DC2 observations are generated at 8 different times with an observation interval of  $\Delta t_{\text{Obs}} = 0.5$ . This observation interval is chosen rather large to ensure a large divergence of the system. For cases DC3 and DC4 observations are generated at 80 different times with an observation interval of  $\Delta t_{\text{Obs}} = 0.05$ . This interval is often used in other studies (e.g. Nakano et al., 2007; van Leeuwen, 2010; Poterjoy, 2016).” and in lines 206-208: “Four time domain reflectometry (TDR)-like water content observations are generated equidistantly at depths of (0.2, 0.4, 0.6, 0.8) m. The observation error is chosen to be  $\sigma_{\text{Obs}} = 0.007$  (e.g., Jaumann and Roth, 2017). Observations are taken hourly for a duration of 30 h.”

- *Section 4: Which method was used for joint state and parameter estimation?*

**Reply:** We clarified this and specify ‘state augmentation method’ instead of ‘as part of the augmented state’.

Lines 268-269 now read:

“In this case, the error in the parameter  $n$  is not only represented but also estimated using the state augmentation method.”

- *Figure 1: Show the results corresponding with forecast in figures 1a,b,d for comparison. Explain what is and .*

**Reply:** We have added the forward run, starting from the truth but with wrong parameter ( $F=10$ ) to Figures 2b and 2d as well. We did not add it to figure 2a, where the truth as well as the ensemble is propagated with the same parameter ( $F=8$ ). Hence, a comparison with a free forward run with  $F=10$  is not needed and a free forward run with  $F=8$  but again starting from the true initial state would just correspond to the synthetic truth again.

In regards to the request to ‘Explain what is and .’, it seems like the symbols are not displayed in the comment. We did find in the figure caption that we did not specify that  $x_2$  corresponds to the state dimension 2 and have added this in the caption.

The corresponding part of the figure caption now reads:

“Top panels : The ensemble mean (orange line) and the ensemble (light orange lines) in the data assimilation run for state dimension 2  $x_2$  together with the observations (purple), generated from the truth (black dashed line). (b-d) additionally show a single forward run (blue dashed line) using a wrong parameter  $F = 10$  starting from the true initial condition.”

- *Figure 2: results obtained with the forward run without data assimilation should present in figures b,c,d for comparison.*

**Reply:** We added the forward run to Figures 3c and 3d and adjusted the caption accordingly. Figure 3b already contains the forward run. We did not add it to figure 3a, since in this cases ensemble and truth use the same parameter.

The corresponding part of the figure caption now reads:

“(b-d) additionally show a single forward run (blue dashed line) using a wrong parameter  $n = 2.68$  starting from the true initial condition.”

# Technical note: Sequential ensemble data assimilation in convergent and divergent systems

Hannes Helmut Bauser<sup>1,2</sup>, Daniel Berg<sup>2,3</sup>, and Kurt Roth<sup>2,4</sup>

<sup>1</sup>Biosphere 2, University of Arizona, USA

<sup>2</sup>Institute for Environmental Physics (IUP), Heidelberg University, Germany

<sup>3</sup>HGS MathComp, Heidelberg University, Germany

<sup>4</sup>Interdisciplinary Center for Scientific Computing (IWR), Heidelberg University, Germany

**Correspondence:** Hannes Helmut Bauser (hbauser@arizona.edu)

**Abstract.** Data assimilation methods are used throughout the geosciences to combine information from uncertain models and uncertain measurement data. However, the characteristics of geophysical systems differ and may be distinguished between divergent and convergent systems. In divergent systems initially nearby states will drift apart, while they will coalesce in convergent systems. This difference has implications for the application of sequential ensemble data assimilation methods. This study explores these implications on two exemplary systems: the divergent Lorenz-96 model and the convergent description of soil water movement by the Richards equation. The results show that sequential ensemble data assimilation methods require a sufficient divergent component. This makes the transfer of the methods from divergent to convergent systems challenging. We demonstrate through a set of case studies that it is imperative to represent model errors adequately and incorporate parameter uncertainties in ensemble data assimilation in convergent systems.

## 10 1 Introduction

Information on physical systems is often available in two forms: on the one hand from observations and on the other hand through mathematical models describing the systems dynamics. The combination of both can lead to an improved description of the system. This is the aim of data assimilation, typically with a focus on state estimation.

Data assimilation has broad applications throughout the geosciences and can be already seen as an independent discipline (Carrassi et al., 2018). It is typically used to estimate states, but also parameters: in weather forecasting (Houtekamer and Zhang, 2016; Ruiz et al., 2013), for atmospheric chemical transport (Carmichael et al., 2008; Zhang et al., 2012) also coupled to meteorology (Bocquet et al., 2015), in oceanography including biogeochemical processes (Stammer et al., 2016; Edwards et al., 2015), and in hydrology for flow, transport, and reaction in terrestrial surface and subsurface systems (Liu et al., 2012). Data assimilation is also increasingly applied in ecology with applications ranging from the spread of infectious diseases and wildfires, to population dynamics, and to the terrestrial carbon cycle (Niu et al., 2014; Luo et al., 2011).

~~The geophysical systems may be distinguished~~ In this study we distinguish geophysical systems between divergent and convergent systems, depending on the development of two initially nearby states ~~-(Fig. 1)~~. In a divergent system, initially close states will inevitably drift apart, even if the system is described by a perfect model (Kalnay, 2003). This leads to an upper

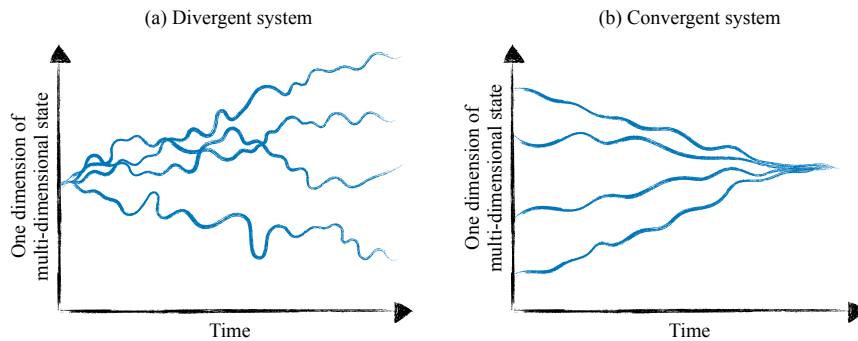

**Figure 1.** Dynamics of a generic divergent and convergent dynamic system with different initial states. Both panels show a single state dimension of a multi-dimensional system. In the divergent system, initially infinitesimally close states drift apart, while in the convergent system initially apart states converge.

limit for the predictability in divergent systems (Lorenz, 1982). In a convergent system, nearby trajectories will coalesce. If the model to describe such a convergent system is perfect, this results in a high predictability (Lorenz, 1996). An error in the initial state will decay towards the truth after some transient phase. However, this is only true for perfect models, which is usually not the case for geophysical systems. This can lead to a bias with ~~the state converging~~ convergence to a wrong state.

Many recent advances of data assimilation methods have been developed in the context of weather forecasting (van Leeuwen et al., 2015). They are therefore designed to meet the challenges in the atmosphere – a predominantly divergent system. Due to the fundamental limit for long time predictions from uncertain initial conditions in divergent systems, data assimilation in operational weather forecasting primarily focuses on state estimation (Reichle, 2008; van Leeuwen et al., 2015).

~~Several~~ While weather forecasting or oceanography are divergent systems, several geophysical system, such as soil hydrology or ~~atmospheric~~–chemical transport are convergent systems. In ensemble data assimilation methods, ~~where uncertainties are if uncertainties are only~~ represented through an ensemble of states, this leads to decreasing uncertainties over time, which favors filter degeneration. This difference to divergent systems, where the ensemble spread increases exponentially, makes the direct transfer of data assimilation methods from divergent systems to convergent systems challenging and often requires adaptations to prevent filter degeneracy. The application of data assimilation when coupling a divergent and a convergent model, for example in coupled chemistry meteorology models, may lead to potentially new difficulties (Bocquet et al., 2015).

The largest uncertainties in convergent systems typically do not reside in uncertain initial conditions but rather in boundary conditions, which include external forcings, the representation of sub-scale physics through parameterizations, and unrepresented physics in the model equations. These uncertainties should then be addressed integrately (Liu and Gupta, 2007). Therefore, data assimilation methods have been used to not only estimate states but ~~to also estimate~~ also parameters to reduce these uncertainties. The combined estimation of states and parameters is thought to be a solution of reducing the impact of model errors on parameter estimation (Liu et al., 2012). Estimating parameters in ensemble data assimilation methods through

45 an augmented state requires a forward model for the parameters as well. This model is typically assumed to be constant, which is neither divergent nor convergent. However, the filter will gradually reduce the uncertainty in the parameters, which is not increased through a divergent forward model and challenges similar to convergent systems can arise. This is sometimes alleviated by assigning a random walk as the forward model to the parameters, which then requires to determine an appropriate step size, however.

50 A challenge for sequential ensemble data assimilation in convergent systems is to maintain a sufficient ensemble spread. This would require an adequate representation of all uncertainties, including unrepresented physics in the model equations. In real world systems this is often difficult or impossible. Therefore, practical alternatives are necessary, which are often heuristic and may interfere with basic assumptions in the data assimilation methods, however. One possibility are inflation methods, which counteract the coalescing tendency. Unfortunately, there exist no universal method to accomplish this and a range of  
55 approaches are followed. One example is the increase of the ensemble spread of parameters to a threshold value, as soon as the parameter uncertainty drops below this value. This approach ~~has~~ was introduced for a sea-breeze model (Aksoy et al., 2006) and has been used in hydrology, as well (e.g. Shi et al., 2014; Rasmussen et al., 2015). A modification to this, also applied in hydrology, is to keep the parameter uncertainty entirely constant (Han et al., 2014; Zhang et al., 2017). This ensures a sufficient ensemble spread in the state itself, but can impact the accuracy of the estimation. A widely used adjustment to limit  
60 the reduction of an ensemble spread in hydrology is the use of a damping factor (Hendricks Franssen and Kinzelbach, 2008). ~~Also in~~ In soil hydrology, a multiplicative inflation method was proposed, specifically adjusted to the needs of the system (Bauser et al., 2018). Similarly, Constantinescu et al. (2007) showed that an atmospheric chemical transport model required ~~stronger inflation~~ much stronger inflation than reported in the meteorological literature and showed better results for a model specific inflation, where the key parameters are perturbed to achieve an increased spread in the state. Consequently, a better  
65 understanding and control over errors has been recognized as a major challenge in chemical data assimilation as well (Zhang et al., 2012).

Although plenty of knowledge and experience is available in the different communities how to handle data assimilation methods in their specific model, we are not aware of a fundamental analysis of the difference between divergent and convergent models with respect to their utilization within ensemble data assimilation frameworks. We investigate and demon-  
70 strate the different challenges, that illustrate for example the different requirements for inflation methods, using the ensemble Kalman filter (Evensen, 1994; Burgers et al., 1998). The divergent case is illustrated using the Lorenz-96 model (Lorenz, 1996), while for the convergent case, a soil hydrological system described by Richards' equation is used. Naturally, these are highly simplified models compared to real-world applications. Still, they demonstrate key aspects that also have to be addressed in more complicated situations. The specific adjustments applied there depend on the particular model. Our focus here is on the  
75 fundamentals, not on the wide range of specifics.



## 2 Data assimilation method

For this study we chose the ensemble Kalman filter (EnKF), a sequential data assimilation method, based on Bayes' theorem and the assumption of unbiased Gaussian error distributions. It was introduced as an extension of the Kalman filter (Kalman, 1960) for nonlinear models (Evensen, 1994; Burgers et al., 1998) and approximates the Gaussian distributions by an ensemble of states  $\psi_i$ , where the subscript  $i$  denotes the ensemble member.

To sequentially assimilate new observations, the EnKF alternates between a forecast (subscript 'f') and an analysis step (subscript 'a'). In the forecast, the ensemble is propagated using the nonlinear model  $f(\cdot)$

$$\psi_{f,i}^k = f(\psi_{f,i}^{k-1}) + \beta^k, \quad (1)$$

where  $\beta^k$  is a stochastic model error and  $k$  is a discrete time.

The analysis state  $\psi_a$  is calculated by applying the Kalman gain

$$\mathbf{K}^k = \mathbf{P}_f^k \mathbf{H}^\top (\mathbf{H} \mathbf{P}_f^k \mathbf{H}^\top + \mathbf{R}^k)^{-1} \quad (2)$$

to every ensemble member. The Kalman gain weights the forecast error covariance  $\mathbf{P}$  with the observation error covariance  $\mathbf{R}$ . The observation operator  $\mathbf{H}$  maps the state from state space to observation space. The forecast error covariance  $\mathbf{P}$  is calculated using the forecast ensemble

$$\mathbf{P}_f^k = \overline{(\psi_f^k - \overline{\psi_f^k})(\psi_f^k - \overline{\psi_f^k})^\top}. \quad (3)$$

It is necessary to add a realization of the observation error to the observation for each ensemble member (Burgers et al., 1998). The resulting analysis state is

$$\psi_{a,i}^k = \psi_{f,i}^k + \mathbf{K}^k \left( d^k - \mathbf{H} \psi_{f,i}^k + \epsilon_i^k \right), \quad \epsilon_i^k \propto \mathcal{N}(\mathbf{0}, \mathbf{R}^k). \quad (4)$$

By combining the information from measurement and model, the uncertainty in the analysis ensemble is decreased. For sequential data assimilation, the process of forecast and analysis is iterated for every new observation.

The joint estimation of states and parameters can be realized through state augmentation. The original state  $\psi$  is extended with the parameters  $\mathbf{p}$  to an augmented state

$$\mathbf{u} = \begin{pmatrix} \psi \\ \mathbf{p} \end{pmatrix}. \quad (5)$$

The model equation (Eq. 1) changes to

$$\mathbf{u}^k = \begin{pmatrix} \psi^k \\ \mathbf{p}^k \end{pmatrix} = \begin{pmatrix} f_\psi(\psi^{k-1}, \mathbf{p}^{k-1}) + \beta_\psi^k \\ f_p(\mathbf{p}^{k-1}) + \beta_p \end{pmatrix}, \quad (6)$$

with the models for the state  $f_\psi(\cdot)$  and for the parameters  $f_p(\cdot)$ , as well as the corresponding model errors  $\beta_\psi$  and  $\beta_p$ . The model for the state is typical nonlinear, while the parameters are often assumed constant  $f_p(\mathbf{p}^{k-1}) = \mathbf{p}^{k-1}$ .

In this study, we set both stochastic model errors in Eq. (6) to zero. The EnKF is used without any extensions and an ensemble size of  $N = 100$  was chosen for all cases.

### 105 3 Divergent system

This section demonstrates the data assimilation behavior for a divergent system on the example of the 40-dimensional Lorenz-96 model, which has been widely used to test data assimilation methods in atmospheric sciences (e.g., Li et al., 2009). We first introduce the model before we look into four characteristic different cases.

#### 3.1 Lorenz-96

110 The Lorenz-96 model (Lorenz, 1996) is an artificial model and cannot be derived from any dynamic equation (Lorenz, 2005). It can be interpreted as an unspecified scalar quantity  $x$  in a one dimensional atmosphere on a latitude circle and was defined in a study on predictability (Lorenz, 1996).

The governing equations are a set of coupled ordinary differential equations:

$$\frac{dx_i}{dt} = (x_{i+1} - x_{i-2})x_{i-1} - x_i + F \quad , \quad i \in [1, 2, \dots, J] \quad (7)$$

115 with constant forcing  $F$ , periodic boundaries ( $x_{J+1} = x_1$ ) and dimension  $J$ . The dimension is often chosen as  $J = 40$ , which we also do in this study. Even though the system is not derived from physical principles, it shares certain properties of large atmospheric models (Lorenz and Emanuel, 1998). The quadratic terms represent advection and conserve the total energy, while the linear term decreases the total energy comparable to dissipation. The constant  $F$  represents external forcing and prevents the system's total energy from decaying to zero. The value is often chosen as  $F = 8$  (Lorenz and Emanuel, 1998).

120 The Lyapunov exponent quantifies ~~the local speed of separation of two~~ how fast two initially infinitesimal close trajectories will separate. Analyzing the ~~averaged~~-leading Lyapunov exponent for  $F = 8$  shows a doubling time of ~~0.42~~  $\tau_d = 0.42$  units for the distance between two initially infinitesimally close neighboring states (Lorenz and Emanuel, 1998). ~~However, the growth rate in a short interval can be considerably larger or smaller. A local linear stability analysis shows that the Lorenz-96 model has 13 positive Lyapunov exponents (Lorenz and Emanuel, 1998). This means that 13 directions of the eigenbasis are divergent, while the other 27 directions are convergent.~~

125 Increasing the forcing leads to a more divergent system. ~~For~~, for instance  $\tau_d = 0.3$  for  $F = 10$  ~~the Lorenz-96 model has 14 positive Lyapunov exponents (instead of 13). Furthermore, the doubling time, decreases from 0.42 to 0.3 (Lorenz, 1996), which also decreases the~~ (Lorenz, 1996). With  $\tau_d$  decreasing, so does the predictability of the system.

#### 3.2 Characteristic cases

130 The ~~model is solved using a fourth order Runge-Kutta method with a time step of  $\Delta t = 0.01$ . The~~ behavior of the EnKF on a divergent system is investigated through four different cases (DC1-4), which are purposely designed simple to illustrate the behavior concisely. For all cases, the model is solved using a fourth order Runge-Kutta method with a time step of  $\Delta t = 0.01$ .

The initial condition for the synthetic truth for all cases is generated by running the model until time 2000 from an initial state  $x_i = 4.0 \forall i \in [1, 2, \dots, 39]$  and  $x_{40} = 4.001$ , with the typical value  $F = 8$  for the forcing parameter. The final state of this run  
135 is used as the synthetic true initial state for all cases. This ensures that the state is on the attractor without the initial transient

phase. The initial ensemble for the data assimilation runs is generated by perturbing the true initial state with a Gaussian distribution  $\mathcal{N}(0, 1)$ .

140 Synthetic observations are generated in all 40 dimensions by a forward run until time 4, using the true value and perturbing it with a Gaussian distribution with a zero mean and a standard deviation of  $\sigma_{\text{obs}} = 1.0$ . For cases DC1 and DC2 observations are generated at 8 different times with an observation interval of  $\Delta t_{\text{Obs}} = 0.5$ . This observation interval is chosen rather large to ensure a large divergence of the system. For cases DC3 and DC4 observations are generated at 80 different times with an observation interval of  $\Delta t_{\text{Obs}} = 0.05$ . This interval is often used in other studies (e.g. Nakano et al., 2007; van Leeuwen, 2010; Poterjoy, 2016).

### 3.2.1 Divergent case 1 (DC1) – state estimation, true parameter

145 In this case, the ensemble is propagated with the same parameter ( $F = 8$ ) as the synthetic truth. Uncertainty only stems from the uncertainty in the initial condition. Figure 2a shows the time development of one state dimension of the Lorenz-96 model (top panel) and the ensemble variance of this state dimension  $\sigma_{\text{dim}}^2$  together with the mean variance over all dimensions  $\sigma^2$  (bottom panel). The ensemble ~~Due to the divergent nature of the model, the ensemble spread increases between observations and the ensemble~~ has a sufficient ~~ensemble~~ spread such that the EnKF is able to correct the states to follow the truth.

150 The mean ensemble spread  $\sigma^2$  increases exponentially between two observations. At each observation, the EnKF updates the ensemble and the variance decreases correspondingly.

The behavior of  $\sigma_{\text{dim}}^2$  differs from the behavior of  $\sigma^2$ . During the forecast,  $\sigma_{\text{dim}}^2$  sometimes increases, decreases or stays approximately constant. This occurs because the Lorenz-96 model is bounded and has, therefore, convergent and divergent directions.

### 155 3.2.2 Divergent case 2 (DC2) – state estimation, wrong parameter

In this case, ~~the~~ in order to investigate the impact of an unrepresented model error, the ensemble is propagated with a wrong parameter of  $F = 10$  instead of  $F = 8$  (Fig. 2b), which was used to generate the observations. Therefore, the ensemble is propagated with a model that is more divergent than the synthetic truth.

160 Compared to DC1 (Fig. 2a, bottom panel),  $\sigma^2$  and  $\sigma_{\text{dim}}^2$  increase faster and the ensemble spread reaches higher values, which shows the increased divergence of the system. Propagating the ensemble with this different model leads to a larger deviation of the ensemble mean from the truth (see Fig. 2b, top panel) than in DC1. However, the divergent nature of the model ensures a sufficient ensemble spread such that the state can be corrected towards the truth and the ~~the~~ wrong parameter is compensated. This leads to a worsened but still good estimation of the truth without filter divergence.

### 3.2.3 Divergent case 3 (DC3) – state estimation, small observation interval, wrong parameter

165 The case is similar to DC2 except that the observation interval is reduced to  $\Delta t_{\text{Obs}} = 0.05$ . The high frequency of analysis steps, where the Kalman update reduces the variance in the ensemble, prevents the Lorenz-96 model to develop enough divergence

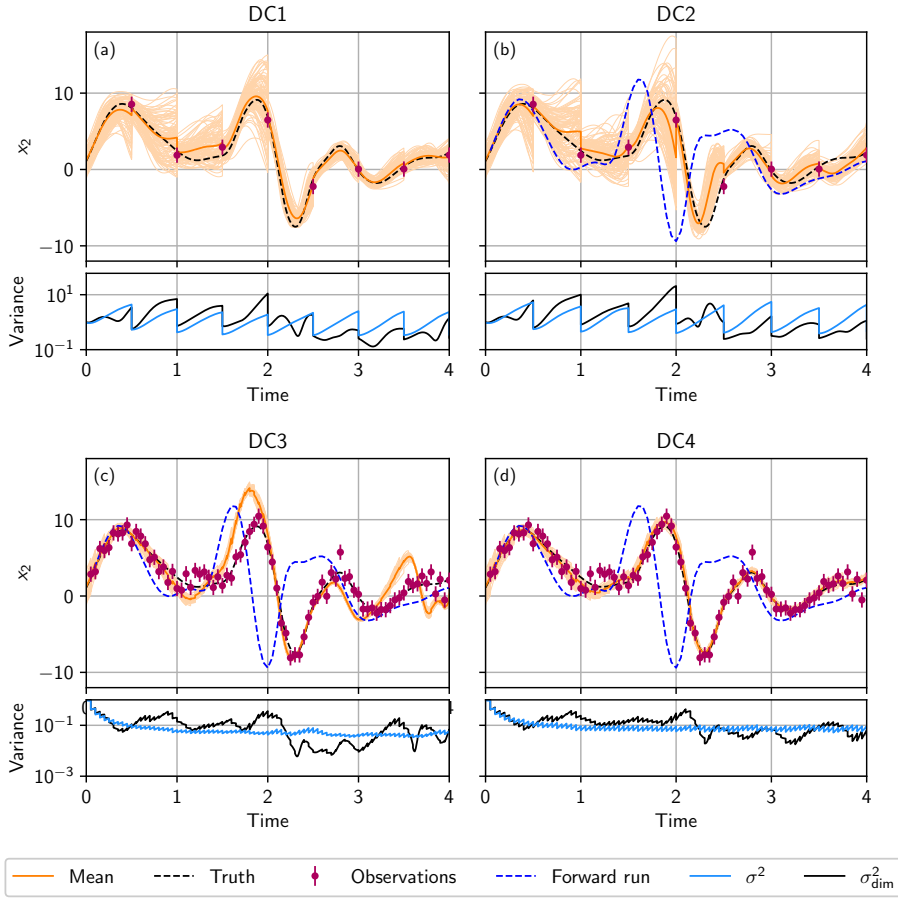

**Figure 2.** State estimation in a divergent system. (a): Divergent case 1 (DC1), the ensemble is propagated with the same parameter as the truth ( $F = 8$ ). (b): Divergent case 2 (DC2), the ensemble is propagated with  $F = 10$  instead. (c): Divergent case 3 (DC3), the ensemble is propagated with  $F = 10$  and the observation interval is reduced to  $\Delta t_{\text{Obs}} = 0.05$ . (d): Divergent case 4 (DC4), the parameter error is represented by the ensemble using  $\mathcal{N}(10, 2^2)$  for the reduced observation interval of  $\Delta t_{\text{Obs}} = 0.05$ . Top panels: The ensemble mean (orange line) and the ensemble (light orange lines) in the data assimilation run for state dimension 2  $x_2$  together with the observations (purple), generated from the truth (black dashed line). (e-b-d) additionally shows show a single forward run (blue dashed line) using a wrong parameter  $F = 10$  starting from the true initial condition. Bottom panels: Mean variance  $\sigma^2$  (light blue line) of the ensemble over all dimensions and variance  $\sigma_{\text{dim}}^2$  (black light blue line) and variance  $\sigma_{\text{dim}}^2$  of state dimension 2 (black line).

to increase the ensemble spread sufficiently in the short time intervals in between (see Fig. 2ac, bottom panel). Although the ensemble is propagated with a more divergent model ( $F = 10$ ), the divergence is not sufficient to encompass the model error due to the wrong parameter and the filter can degenerate (see Fig. 2c, top panel). This is in contrast to DC2, where the Kalman filter can successfully estimate the state. However, the comparison with the forecast of the true initial state using the wrong parameter shows that the EnKF is able to improve the state significantly.

### 3.2.4 Divergent case 4 (DC4) – state estimation, small observation interval, represented error

In divergent case 4 (DC4), the observation interval is, as in DC3, reduced to  $\Delta t_{\text{Obs}} = 0.05$ . The parameter error is represented by the ensemble by assigning each ensemble member a different parameter  $F$ . The forcing parameter  $F$  is drawn from a Gaussian distribution  $\mathcal{N}(10, 2^2)$ , such that the true value lies within one standard deviation .

Representing the error increases  $\sigma^2$  only slightly (Fig. 2d, bottom panel) compared to DC3, but the minimal variance of  $\sigma_{\text{dim}}^2$  has higher values. This [change-increase](#) is sufficient to help the filter such that it does not degenerate (Fig. 2d, top panel). Representing the parameter error in the [ensemble in the](#) case of frequent observations can prevent filter degeneracy.

## 4 Convergent system

This section demonstrates the data assimilation behavior for a convergent system on the example of soil water flow. We again first introduce the model before we look into four characteristic cases.

### 4.1 Soil water flow

Water flow in an unsaturated porous medium can be described by the Richards equation:

$$\partial_t \theta - \nabla \cdot [K(\theta) [\nabla h_m(\theta) - 1]] = 0, \quad (8)$$

where  $\theta (-)$  is the volumetric water content,  $K (\text{LT}^{-1})$  is the isotropic hydraulic conductivity, and  $h_m (\text{L})$  is the matric head.

To close Eq. 8 soil hydraulic material properties are necessary, which specify the dependency of the matric head and the hydraulic conductivity on the water content. We use the Mualem-van Genuchten parametrisation (Mualem, 1976; Van Genuchten, 1980) in its simplified form:

$$K(\Theta) = K_w \Theta^\tau \left[ 1 - \left[ 1 - \Theta^{n/[n-1]} \right]^{1-1/n} \right]^2, \quad (9)$$

$$h_m(\Theta) = \frac{1}{\alpha} \left[ \Theta^{-n/[n-1]} - 1 \right]^{1-1/n}, \quad (10)$$

with the saturation  $\Theta (-)$

$$\Theta := \frac{\theta - \theta_r}{\theta_s - \theta_r}. \quad (11)$$

The parameter  $\theta_s (-)$  is the saturated water content and  $\theta_r (-)$  is the residual water content. The matric head  $h_m$  is scaled with the parameter  $\alpha (\text{L}^{-1})$  that can be related to the inverse air entry value. The parameter  $K_w (\text{LT}^{-1})$  is the saturated hydraulic conductivity,  $\tau (-)$  a tortuosity factor and  $n (-)$  is a shape parameter. Equation (9) and Eq. (10) describe the sub-scale physics with six parameters for a homogeneous soil.

## 4.2 Characteristic cases

The behavior of the EnKF on a convergent system is investigated through four different cases (CC1-4). For the case studies, a one-dimensional homogeneous soil is used with an extent of 1 m. The Richards equation is solved using MuPhi (Ippisch et al., 2006) with a spatial resolution of 1 cm, which results in a 100-dimensional water content state.

For the true trajectories and the observations, parameters for a loamy sand by Carsel and Parrish (1988) are used:  $\theta_s = 0.41$ ,  $\theta_r = 0.057$ ,  $\tau = 0.5$ ,  $n = 2.28$ ,  $\alpha = -12.4 \text{ m}^{-1}$ , and  $K_w = 4.00 \cdot 10^{-5} \text{ m s}^{-1}$ . For the lower boundary, a Dirichlet condition with zero potential (groundwater table) is set and for the upper boundary a constant infiltration over the whole observation time with a flux of  $5 \cdot 10^{-7} \text{ m s}^{-1}$  is used.

Initially, the system is in hydraulic equilibrium. The infiltration boundary condition leads to a downward propagating infiltration front increasing the water content. Four [time domain reflectometry \(TDR\)-like](#) water content observations are generated equidistantly at depths of (0.2, 0.4, 0.6, 0.8) m. The observation error is chosen to be  $\sigma_{\text{Obs}} = 0.007$  (e.g., Jaumann and Roth, 2017). Observations are taken hourly for a duration of 30 h.

To generate the initial ensemble, the ensemble mean [of the water content state](#) is perturbed by a correlated multivariate Gaussian distribution [using a Cholesky decomposition to create an ensemble that corresponds to a predefined covariance matrix \(e.g., Berg et al., 2019\)](#). The main diagonal of ~~the covariane matrix~~ [this covariance matrix of the ensemble](#) is  $0.003^2$ . The off-diagonal entries are determined by multiplying the variance on the main diagonal with the [Gaspari and Cohn function \(Gaspari and Cohn, 1999\)](#) ~~the fifth-order piecewise rational function by Gaspari and Cohn (1999)~~ using a length scale of  $c = 10 \text{ cm}$ . This ensures a [spatially](#) correlated initial state, which increases the diversity of the ensemble. If instead uncorrelated Gaussian random numbers with a zero mean were used, the dissipative component of the system would lead to a fast ~~dissipation~~ [vanishing](#) of the perturbation [in space for each individual ensemble member](#).

### 4.2.1 Convergent case 1 (CC1) – no estimation

In this case no data assimilation is used and the ensemble is propagated with the true model. The initial conditions for the ensemble members are based on ~~an on~~ the linearly interpolated observations at time zero. This approximated state is used as the ensemble mean for the EnKF. This state is then perturbed by a correlated multivariate Gaussian distribution such that the spread of the initial ensemble is sufficient to represent the uncertainty of the water content in most parts.

The temporal development of the water content at 20 cm depth, the position of the uppermost observation, is shown in Fig. 3a (top panel). ~~The~~ [Due to the convergent behavior of the model in combination with the true representation, the](#) initially broad ensemble ~~slowly collapses~~ [converges](#) to the truth, [even though the initial condition was not represented accurately](#).

The ensemble variance ~~in at~~ this depth  $\sigma_{\text{dim}}^2$  increases when the infiltration front reaches 20 cm. Because of the nonlinear conductivity function ([FigEq. 9](#)), the different initial water contents lead to a different arrival time of the infiltration front at the first observation position. This leads to an increase in the ensemble spread.

After the increase of the water content, the ensemble collapses fast since the hydraulic conductivity increases with the water content, which leads to a fast convergence of the different ensemble members to the truth due the convergent nature of the

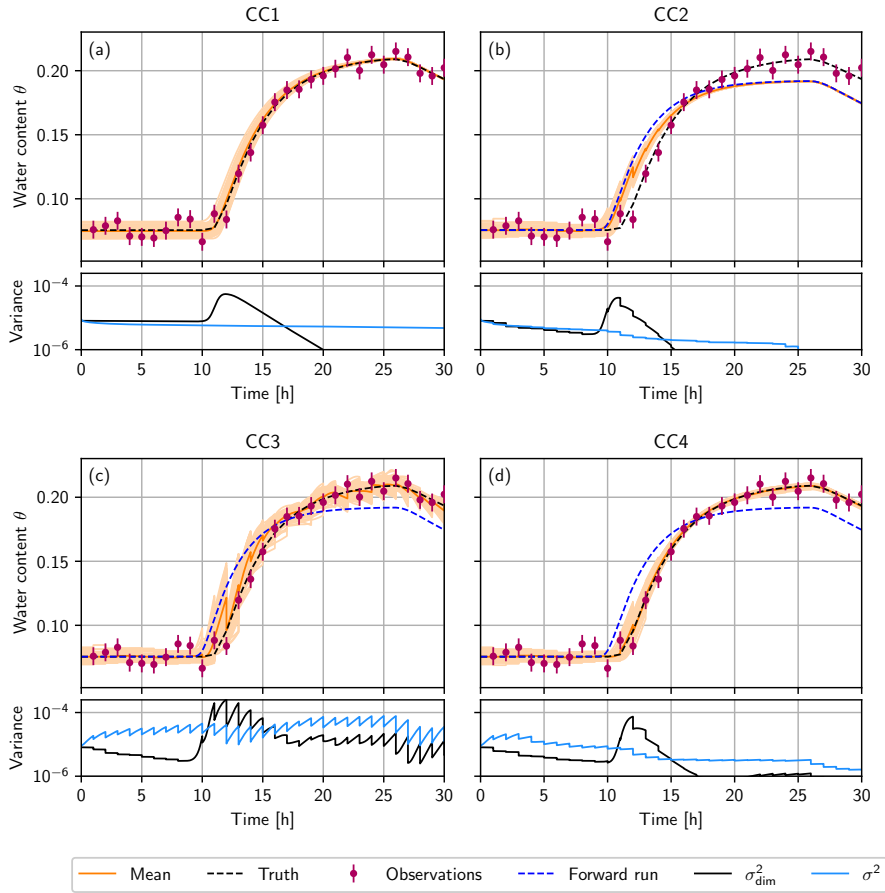

**Figure 3.** (a): Convergent case 1 (CC1): forward run without data assimilation, using an interpolated initial condition. In the other three cases the truth as used to generate the initial ensemble. (b): Convergent case 2 (CC2): the ensemble is propagated with  $n = 2.68$  instead of  $n_{\text{true}} = 2.28$  and the state is estimated. (c): Convergent case 3 (CC3): the parameter error is represented by the ensemble using  $\mathcal{N}(2.68, 0.4^2)$  and the state is estimated. (d): Convergent case 4 (CC4): simultaneous state and parameter estimation. Top panels: The ensemble mean (orange) and the ensemble (light orange lines) during the forward run at the depth of the uppermost observation (20 cm). The truth, which is used to generate the observations (purple), is shown as a black dashed line. (b-d) additionally shows a single forward run (blue dashed line) using a wrong parameter  $n = 2.68$  starting from the true initial condition. Bottom panels: Mean variance  $\sigma^2$  (light blue line) of the ensemble over all dimensions and variance  $\sigma_{\text{dim}}^2$  (black-light blue line) and variance  $\sigma_{\text{dim}}^2$  at the depth of 20 cm (black line).

230 model. The variance over all dimensions  $\sigma^2$  decreases slowly and approaches zero over time. If the system is started with a higher water content instead of equilibrium, this collapse will occur faster.

This case shows that ~~the predictability for a perfect~~ a perfectly convergent system is ~~infinite~~ predictable for all times. This is in contrast to divergent systems, that only have a finite limit of predictability even if the model including boundary conditions

is perfectly known. After a transient phase, the states converge to the truth (Kalnay, 2003). A perfect model is not what we  
235 encounter in reality, however.

#### 4.2.2 Convergent case 2 (CC2) – state estimation, wrong parameter

In this case, the state is estimated with the EnKF but the ensemble is propagated with a wrong parameter. Instead of  $n_{\text{true}} = 2.28$ ,  
 $n = 2.68$  is chosen. The mean for the initial state is chosen as the true initial water content.

In Fig. 3b (top panel) the temporal development of the water content in-at the depth of the uppermost observation (20 cm) is  
240 shown. A larger  $n$  results in an earlier arrival of the infiltration front at the depth of 20 cm for the ensemble than for the truth.  
The EnKF tries to correct the ensemble but fails because its variance is too small and cannot represent the truth. Due to the  
convergent system,  $\sigma^2$  decreases constantly while  $\sigma_{\text{dim}}^2$  decreases fast to zero after the infiltration front reaches the depth of  
20 cm (see Fig. 3b, bottom panel). This convergence leads to a false trust in the model and the filter degenerates. Compared  
245 to a forward run without data assimilation, the EnKF can only improve the state estimation for a short time when the water  
content rises due to the infiltration front. Soon after, the ensemble coincides with the free forward run and the estimated state  
shows no advantage any more.

This case illustrates that a wrong parameter in a convergent system can lead to filter degeneration. This is in direct contrast  
to DC2 (Fig. 2b), where the filter is still able to estimate the state. The behavior also differs from DC3 (Fig. 2c), where the  
observation interval in the Lorenz-96 model is too short such that it cannot develop its full divergent behavior. There the filter  
250 can also degenerate for a wrong parameter, but the data assimilation is still able to improve the estimation compared to a free  
forward run, since the ensemble never collapses entirely.

#### 4.2.3 Convergent case 3 (CC3) – state estimation, represented error

In this case, the parameter error is represented with the ensemble but the parameter is not estimated. Each ensemble member  
has a different parameter  $n$ . The parameters are Gaussian distributed with  $\mathcal{N}(2.68, 0.4^2)$  such that the truth lies within one  
255 standard deviation. Since the model error is known in this synthetic case we can create an ensemble that represents the model  
error adequately. Note, that this is more difficult or even impossible in a real-world system. The mean for the initial state is  
chosen as the true initial water content.

Figure 3c (top panel) shows the temporal development of the water content in-at a depth of 20 cm. The infiltration front  
reaches this depth at different times due to the different parameter  $n$  for each ensemble member. This increases the variance  
260 in the ensemble both, in-, both at this depth and overall (see Fig. 3c, bottom panel). The variance increases rapidly between the  
observations, similar to the divergent cases. This way, the ensemble spread stays large enough such that the EnKF can correct  
the states. The ensemble can follow and represent the truth. This behaviour can also be observed for the divergent  
case DC4 with a short observation interval (Fig. 2d).

Representing the model error adds a divergent component to the ensemble for a convergent model. This allows the EnKF  
265 to correct the state and follow the truth. However, the predictability of the system decreases since each ensemble member  
converges to a different fixed point apart from the truth. To increase the predictability, parameter estimation is necessary.



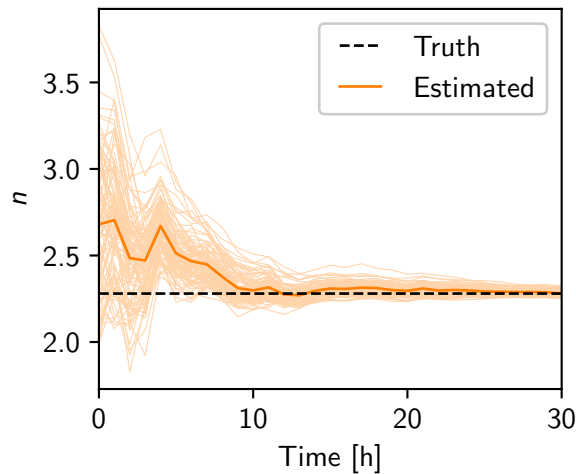

**Figure 4.** Estimation of parameter  $n$  in convergent case 4 (CC4). The ensemble mean is shown in orange and the ensemble in light orange. The truth is a black dashed line.

#### 4.2.4 Convergent case 4 (CC4) – state and parameter estimation

In this case, the error in the parameter  $n$  is not only represented but also estimated ~~as part of the augmented state using the state augmentation method~~. The initial parameter set is, as in CC3, Gaussian distributed with  $\mathcal{N}(2.68, 0.4^2)$  such that the truth is located within one standard deviation. Again, the mean for the initial state is chosen as the true initial water content.

The estimation of  $n$  is shown in Fig. 4. The ensemble converges ~~rapidly~~ to the truth ~~in a fast way~~ because only one parameter is estimated, so every deviation from the truth is mainly caused by this parameter.

The mean variance  $\sigma^2$  increases initially (Fig. 3d, bottom panel), because in the beginning the parameter has not been sufficiently improved such that the ensemble members still have different  $n$ . This leads to a divergent ensemble in state space during the infiltration similar to CC3. While the parameter is estimated, the variance of the ensemble decreases fast and the convergent property of the system becomes dominant.

The temporal development of the water content ~~in at~~ a depth of 20 cm is shown in Fig. 3d (top panel). In contrast to CC3, the corrections of the EnKF to the state are much smaller. The mean of the parameter  $n$  comes close to the true value and the uncertainty of  $n$  decreases. This causes the forward propagation to come close to the true model as well. The propagation with an almost correct model supports the state estimation due to the convergent nature of the system which forces the state to the true value.

## 5 Discussion

For the divergent Lorenz-96 system, the EnKF is able to estimate the state for the true model as well as for the case with a wrong parameter. In a divergent system, the volume of the prior in phase-state space increases during forward propagation  
285 (Evensen, 1994). For the EnKF, this is directly connected to the ensemble spread, which increases rapidly between the observations. This prevents a collapse of the ensemble even in the presence of an unrepresented parameter error. However, if the observation interval is too small ~~such that the system cannot develop its full divergent behavior~~relative to the characteristic time for divergence, the EnKF leads to a decrease in the ensemble spread such that the filter degenerates in the case of an unrepresented parameter error. Nevertheless, the divergent behavior of the model prevents a complete collapse of the ensemble,  
290 so that the filter is still able to improve the state in a limited way.

In the convergent soil hydrological system, the volume of the prior distribution decreases during forward propagation such that the prior becomes more certain ~~during the forward propagation~~ even without an observation ~~or~~ and data assimilation. For a perfect model, the predictability and state estimation in a convergent model are trivial. The initial ensemble will converge to the truth after some time, even with a rough initial approximation. In this case, data assimilation is not necessary.

295 In the case of model errors, in our study realized through a wrong parameter, the situation is different. The ensemble converges to a wrong state, the filter degenerates and data assimilation fails. Increasing the ensemble size can only improve the performance marginally since all ensemble members converge to the same fixed point.

Representing the parameter error by assigning each ensemble member a different parameter, increases the divergence of the system and the filter is able to estimate the state again. Between the observations, the ensemble spread increases rapidly  
300 because the ensemble members diverge to different fixed points apart from the truth. This results in a finite predictability. By representing the parameter error, the Richards equation ~~behaves more~~ gains a divergent part similar to the ~~divergent~~-Lorenz-96 model. In the case of a convergent system, it is necessary to represent the parameter error, otherwise the ensemble collapses.

To increase the predictability of the system again, it is necessary to not only represent but also ~~reduce uncertainties in the parameter to reduce the parameter uncertainty~~. In synthetic cases without model structural errors, the convergent property of  
305 the system supports the state estimation and the predictability increases, if the parameter estimation is successful. This shows the importance of parameter estimation for convergent systems. For divergent systems parameter estimation also increases the predictability but only up to a point, because predictability is limited by the system's dynamics.

For the application of data assimilation to real data, model errors typically cannot be attributed to unknown parameters or uncertainties in boundary conditions alone, but also stem from model structural errors like a simplified representation of  
310 sub-scale physics or unrepresented processes in the dynamics. Uncertainties in parameters and boundary conditions can be represented in an ensemble, but representing model structural errors is challenging or can be impossible. For example, in hydrology, the model errors are typically ill-known (Li and Ren, 2011) and can vary both in space and time, which then can lead to filter degeneracy and biased parameter estimation (Berg et al., 2019). While divergent models can alleviate the effect of an unrepresented error within bounds, in a convergent system it is necessary to represent all relevant model errors sufficiently  
315 to prevent filter degeneracy and enable an optimal state and parameter estimation. ~~However, representing these model errors is~~

challenging. For example in hydrology, the model errors are typically ill-known (Li and Ren, 2011) and can vary both in space and time, which then can lead to filter degeneracy and biased parameter estimation (Berg et al., 2019). Since this is challenging or even impossible, heuristic ways to address filter degeneracy are necessary.

320 ~~Alternatively, inflation methods, can help~~ A practical alternative to increase the ensemble spread and avoid filter degeneracy are inflation methods. For example, keeping a constant ensemble spread for the parameters can provide a sufficient spread in state space (Zhang et al., 2017). The advantage is that this approach is a model-specific inflation and avoids overamplification of spurious correlations (Constantinescu et al., 2007). The disadvantage is, that the EnKF is prevented from reducing the prediction uncertainty. This behavior is also shown in CC3. In this case, the ensemble spread in the parameter space adds a divergent component to the ensemble that results in an increased ensemble spread in state space and prevents filter degeneracy.

325 Multiplicative inflation increases the ensemble spread through an inflation factor (Anderson and Anderson, 1999). In a divergent system a small multiplicative inflation is sufficient to increase the existing ensemble spread. In a convergent system this requires a larger inflation and can lead to overinflation of spurious correlations (Constantinescu et al., 2007). To avoid this and to cope with spatial and temporal varying model errors, the use of more sophisticated adaptive inflation methods (e.g. Bauser et al., 2018; Gharamti, 2018) may be necessary in convergent systems.

330 ~~Inflation~~ Heuristic inflation methods cannot fully replace the representation of model errors and hence must be used judiciously. They can lead to overinflation of spurious correlations and can lead to biases in the estimation of parameters. If unrepresented model errors can be identified and are limited in space or time, these biases can be prevented by using a closed-eye period for the extent of the unrepresented model errors. In the closed-eye period, parameters are kept constant and only the state is estimated, which can require inflation methods for a successful state estimation. This enables an improved parameter estimation

335 without compensating the unrepresented model dynamics though biased parameters outside of the closed-eye period, when and where uncertainties can be represented. The use of the closed-eye period in combination with the representation of relevant uncertainties has already been demonstrated in hydrology (Bauser et al., 2016).

## 6 Conclusions

We demonstrated the difference and challenges of ensemble data assimilation for divergent and convergent systems on the

340 example of the EnKF applied to the divergent Lorenz-96 model and a convergent soil water movement model based on the Richards equation.

Sequential ensemble data assimilation methods require a sufficient divergent part in the ensemble to maintain an adequate ensemble spread and prevent filter degeneration. In divergent systems this is inherent to the system, provided that observation intervals and divergence times match. In convergent systems relevant model errors must be represented to increase the ensemble

345 spread and to thereby add a divergent part to the ensemble to avoid filter degeneracy. If errors stem from unknown parameters, estimating the parameters improves state estimation. However, this will reduce the ensemble spread again and require the remaining relevant model errors to be represented. Since this can be challenging, increasing the model errors artificially, by limiting the reduction of parameter uncertainty or through inflation methods, can be required in convergent systems.

This paper highlights the challenges when transferring sequential ensemble data assimilation methods from divergent systems to convergent systems, which must be considered when applying data assimilation.

*Author contributions.* HHB and DB designed and implemented the presented study. DB performed and analyzed the simulations. All authors participated in continuous discussions. HHB and DB prepared the manuscript with contributions from KR. The presented results are based on the PhD thesis by DB.

*Competing interests.* The authors declare that they have no conflict of interest.

*Acknowledgements.* This research was funded by Deutsche Forschungsgemeinschaft (DFG) through project RO 1080/12-1. Daniel Berg was supported in part by the Heidelberg Graduate School of Mathematical and Computational Methods for the Sciences (HGS MathComp), funded by DFG grant GSC 220 in the German Universities Excellence Initiative. Hannes H. Bauser was supported in part by the Deutsche Forschungsgemeinschaft (DFG) through Project BA 6635/1-1.

## References

- 360 Aksoy, A., Zhang, F., and Nielsen-Gammon, J. W.: Ensemble-based simultaneous state and parameter estimation in a two-dimensional sea-breeze model, *Monthly Weather Review*, 134, 2951–2970, <https://doi.org/10.1175/MWR3224.1>, 2006.
- Anderson, J. L. and Anderson, S. L.: A Monte Carlo implementation of the nonlinear filtering problem to produce ensemble assimilations and forecasts, *Monthly Weather Review*, 127, 2741–2758, [https://doi.org/10.1175/1520-0493\(1999\)127<2741:AMCIOT>2.0.CO;2](https://doi.org/10.1175/1520-0493(1999)127<2741:AMCIOT>2.0.CO;2), 1999.
- Bausier, H. H., Jaumann, S., Berg, D., and Roth, K.: EnKF with closed-eye period – towards a consistent aggregation of information in soil hydrology, *Hydrology and Earth System Sciences*, 20, 4999–5014, <https://doi.org/10.5194/hess-20-4999-2016>, 2016.
- 365 Bausier, H. H., Berg, D., Klein, O., and Roth, K.: Inflation method for ensemble Kalman filter in soil hydrology, *Hydrology and Earth System Sciences*, 22, 4921–4934, <https://doi.org/10.5194/hess-22-4921-2018>, 2018.
- Berg, D., Bausier, H. H., and Roth, K.: Covariance resampling for particle filter – state and parameter estimation for soil hydrology, *Hydrology and Earth System Sciences*, 23, 1163–1178, <https://doi.org/10.5194/hess-23-1163-2019>, 2019.
- 370 Bocquet, M., Elbern, H., Eskes, H., Hirtl, M., Žabkar, R., Carmichael, G. R., Flemming, J., Inness, A., Pagowski, M., Pérez Camaño, J. L., Saide, P. E., San Jose, R., Sofiev, M., Vira, J., Baklanov, A., Carnevale, C., Grell, G., and Seigneur, C.: Data assimilation in atmospheric chemistry models: current status and future prospects for coupled chemistry meteorology models, *Atmospheric Chemistry and Physics*, 15, 5325–5358, <https://doi.org/10.5194/acp-15-5325-2015>, 2015.
- Burgers, G., van Leeuwen, P. J., and Evensen, G.: Analysis scheme in the ensemble Kalman filter, *Monthly Weather Review*, 126, 1719–1724, [https://doi.org/10.1175/1520-0493\(1998\)126<1719:ASITEK>2.0.CO;2](https://doi.org/10.1175/1520-0493(1998)126<1719:ASITEK>2.0.CO;2), 1998.
- 375 Carmichael, G. R., Sandu, A., Chai, T., Daescu, D. N., Constantinescu, E. M., and Tang, Y.: Predicting air quality: Improvements through advanced methods to integrate models and measurements, *Journal of Computational Physics*, 227, 3540 – 3571, <https://doi.org/https://doi.org/10.1016/j.jcp.2007.02.024>, predicting weather, climate and extreme events, 2008.
- Carrasi, A., Bocquet, M., Bertino, L., and Evensen, G.: Data assimilation in the geosciences: An overview of methods, issues, and perspectives, *Wiley Interdisciplinary Reviews: Climate Change*, 9, e535, <https://doi.org/10.1002/wcc.535>, 2018.
- 380 Carsel, R. F. and Parrish, R. S.: Developing joint probability distributions of soil water retention characteristics, *Water Resources Research*, 24, 755–769, <https://doi.org/10.1029/WR024i005p00755>, 1988.
- Constantinescu, E. M., Sandu, A., Chai, T., and Carmichael, G. R.: Ensemble-based chemical data assimilation. I: General approach, *Quarterly Journal of the Royal Meteorological Society*, 133, 1229–1243, <https://doi.org/10.1002/qj.76>, 2007.
- 385 Edwards, C. A., Moore, A. M., Hoteit, I., and Cornuelle, B. D.: Regional ocean data assimilation, *Annual Review of Marine Science*, 7, 21–42, <https://doi.org/10.1146/annurev-marine-010814-015821>, 2015.
- Evensen, G.: Sequential data assimilation with a nonlinear quasi-geostrophic model using Monte Carlo methods to forecast error statistics, *Journal of Geophysical Research: Oceans*, 99, 10 143–10 162, <https://doi.org/10.1029/94JC00572>, 1994.
- Gaspari, G. and Cohn, S. E.: Construction of correlation functions in two and three dimensions, *Quarterly Journal of the Royal Meteorological Society*, 125, 723–757, <https://doi.org/10.1002/qj.49712555417>, 1999.
- 390 Gharamti, M. E.: Enhanced adaptive inflation algorithm for ensemble filters, *Monthly Weather Review*, 146, 623–640, <https://doi.org/10.1175/MWR-D-17-0187.1>, 2018.
- Han, X., Hendricks Franssen, H.-J., Montzka, C., and Vereecken, H.: Soil moisture and soil properties estimation in the Community Land Model with synthetic brightness temperature observations, *Water Resources Research*, 50, 6081–6105, <https://doi.org/10.1002/2013WR014586>, 2014.
- 395

- Hendricks Franssen, H. J. and Kinzelbach, W.: Real-time groundwater flow modeling with the ensemble Kalman filter: Joint estimation of states and parameters and the filter inbreeding problem, *Water Resources Research*, 44, <https://doi.org/10.1029/2007WR006505>, 2008.
- Houtekamer, P. L. and Zhang, F.: Review of the ensemble Kalman filter for atmospheric data assimilation, *Monthly Weather Review*, 144, 4489–4532, <https://doi.org/10.1175/MWR-D-15-0440.1>, 2016.
- 400 Ippisch, O., Vogel, H.-J., and Bastian, P.: Validity limits for the van Genuchten–Mualem model and implications for parameter estimation and numerical simulation, *Advances in Water Resources*, 29, 1780–1789, <https://doi.org/10.1016/j.advwatres.2005.12.011>, 2006.
- Jaumann, S. and Roth, K.: Effect of unrepresented model errors on estimated soil hydraulic material properties, *Hydrology and Earth System Sciences*, 21, 4301–4322, <https://doi.org/10.5194/hess-21-4301-2017>, 2017.
- Kalman, R. E.: A new approach to linear filtering and prediction problems, *Journal of basic Engineering*, 82, 35–45,  
405 <https://doi.org/10.1115/1.3662552>, 1960.
- Kalnay, E.: Atmospheric modeling, data assimilation and predictability, Cambridge university press, 2003.
- Li, C. and Ren, L.: Estimation of unsaturated soil hydraulic parameters using the ensemble Kalman filter, *Vadose Zone Journal*, 10, 1205, <https://doi.org/10.2136/vzj2010.0159>, 2011.
- Li, H., Kalnay, E., and Miyoshi, T.: Simultaneous estimation of covariance inflation and observation errors within an ensemble Kalman filter,  
410 *Quarterly Journal of the Royal Meteorological Society*, 135, 523–533, <https://doi.org/10.1002/qj.371>, 2009.
- Liu, Y. and Gupta, H. V.: Uncertainty in hydrologic modeling: Toward an integrated data assimilation framework, *Water Resources Research*, 43, <https://doi.org/10.1029/2006WR005756>, w07401, 2007.
- Liu, Y., Weerts, A. H., Clark, M., Hendricks Franssen, H.-J., Kumar, S., Moradkhani, H., Seo, D.-J., Schwanenberg, D., Smith, P., van  
Dijk, A. I. J. M., van Velzen, N., He, M., Lee, H., Noh, S. J., Rakovec, O., and Restrepo, P.: Advancing data assimilation in opera-  
415 tional hydrologic forecasting: progresses, challenges, and emerging opportunities, *Hydrology and Earth System Sciences*, 16, 3863–3887, <https://doi.org/10.5194/hess-16-3863-2012>, 2012.
- Lorenz, E. N.: Atmospheric predictability experiments with a large numerical model, *Tellus*, 34, 505–513, <https://doi.org/10.1111/j.2153-3490.1982.tb01839.x>, 1982.
- Lorenz, E. N.: Predictability: A problem partly solved, in: *Proc. Seminar on predictability*, vol. 1, 1996.
- 420 Lorenz, E. N.: Designing chaotic models, *Journal of the Atmospheric Sciences*, 62, 1574–1587, <https://doi.org/10.1175/JAS3430.1>, 2005.
- Lorenz, E. N. and Emanuel, K. A.: Optimal sites for supplementary weather observations: Simulation with a small model, *Journal of the Atmospheric Sciences*, 55, 399–414, [https://doi.org/10.1175/1520-0469\(1998\)055<0399:OSFSWO>2.0.CO;2](https://doi.org/10.1175/1520-0469(1998)055<0399:OSFSWO>2.0.CO;2), 1998.
- Luo, Y., Ogle, K., Tucker, C., Fei, S., Gao, C., LaDeau, S., Clark, J. S., and Schimel, D. S.: Ecological forecasting and data assimilation in a data-rich era, *Ecological Applications*, 21, 1429–1442, <https://doi.org/10.1890/09-1275.1>, 2011.
- 425 Mualem, Y.: A new model for predicting the hydraulic conductivity of unsaturated porous media, *Water Resources Research*, 12, 513–522, <https://doi.org/10.1029/WR012i003p00513>, 1976.
- Nakano, S., Ueno, G., and Higuchi, T.: Merging particle filter for sequential data assimilation, *Nonlinear Processes in Geophysics*, 14, 395–408, <https://doi.org/10.5194/npg-14-395-2007>, 2007.
- Niu, S., Luo, Y., Dietze, M. C., Keenan, T. F., Shi, Z., Li, J., and III, F. S. C.: The role of data assimilation in predictive ecology, *Ecosphere*,  
430 5, art65, <https://doi.org/10.1890/ES13-00273.1>, 2014.
- Poterjoy, J.: A localized particle filter for high-dimensional nonlinear systems, *Monthly Weather Review*, 144, 59–76, <https://doi.org/10.1175/MWR-D-15-0163.1>, 2016.

- Rasmussen, J., Madsen, H., Jensen, K. H., and Refsgaard, J. C.: Data assimilation in integrated hydrological modeling using ensemble Kalman filtering: evaluating the effect of ensemble size and localization on filter performance, *Hydrology and Earth System Sciences*, 19, 2999–3013, <https://doi.org/10.5194/hess-19-2999-2015>, 2015.
- 435 Reichle, R. H.: Data assimilation methods in the Earth sciences, *Advances in Water Resources*, 31, 1411 – 1418, <https://doi.org/10.1016/j.advwatres.2008.01.001>, hydrologic Remote Sensing, 2008.
- Ruiz, J. J., Pulido, M., and Miyoshi, T.: Estimating Model Parameters with Ensemble-Based Data Assimilation: A Review, *Journal of the Meteorological Society of Japan. Ser. II*, 91, 79–99, <https://doi.org/10.2151/jmsj.2013-201>, 2013.
- 440 Shi, Y., Davis, K. J., Zhang, F., Duffy, C. J., and Yu, X.: Parameter estimation of a physically based land surface hydrologic model using the ensemble Kalman filter: A synthetic experiment, *Water Resources Research*, 50, 706–724, <https://doi.org/10.1002/2013WR014070>, 2014.
- Stammer, D., Balmaseda, M., Heimbach, P., Köhl, A., and Weaver, A.: Ocean data assimilation in support of climate applications: Status and perspectives, *Annual Review of Marine Science*, 8, 491–518, <https://doi.org/10.1146/annurev-marine-122414-034113>, 2016.
- Van Genuchten, M. T.: A closed-form equation for predicting the hydraulic conductivity of unsaturated soils, *Soil science society of America journal*, 44, 892–898, <https://doi.org/10.2136/sssaj1980.03615995004400050002x>, 1980.
- 445 van Leeuwen, P. J.: Nonlinear data assimilation in geosciences: Fan extremely efficient particle filter, *Quarterly Journal of the Royal Meteorological Society*, 136, 1991–1999, <https://doi.org/10.1002/qj.699>, 2010.
- van Leeuwen, P. J., Cheng, Y., and Reich, S.: Nonlinear data assimilation, vol. 2, Springer, <https://doi.org/10.1007/978-3-319-18347-3>, 2015.
- Zhang, H., Hendricks Franssen, H.-J., Han, X., Vrugt, J. A., and Vereecken, H.: State and parameter estimation of two land surface models using the ensemble Kalman filter and the particle filter, *Hydrology and Earth System Sciences*, 21, 4927–4958, <https://doi.org/10.5194/hess-21-4927-2017>, 2017.
- 450 Zhang, Y., Bocquet, M., Mallet, V., Seigneur, C., and Baklanov, A.: Real-time air quality forecasting, part II: State of the science, current research needs, and future prospects, *Atmospheric Environment*, 60, 656 – 676, <https://doi.org/https://doi.org/10.1016/j.atmosenv.2012.02.041>, 2012.
